# Supplementary material for: Genomic Signatures of Somatic Mutation and Selection in a Bud Sport Population of Bougainvillea × buttiana ‘Miss Manila’
Source: Research Square preprint supplement (doi:10.21203/rs.3.rs-8303143/v1), 2026-01-29
Supplement: Supplementary file 1 [file 55e42484b8c68e3a428ac803.xlsx]

## Sheet: Table S1
Table S1 Basic information of Bougainvillea used in the study
ID	Cultivar Name	Commercial name	Origin	Flower Color	Leaf Color
S1	Bougainvillea × buttiana 'Miss Manila'	Orange	Fujian, China	Orange	Green
S2	Bougainvillea × buttiana 'Miss Manila'	Orange-Pink	Philippines	Bright orange	Green
S3	Bougainvillea × buttiana 'Miss Manila'	Golden Yellow	Philippines	Golden yellow	Green
S4	Bougainvillea × buttiana 'Miss Manila'	Golden-Leaf Orange	Malaysia	White flowers with red margins	Golden leaves
S5	Bougainvillea × buttiana 'Miss Manila'	Golden-Margined Orange	Malaysia	Bright orange	Golden-mottled leaves
S6	Bougainvillea × buttiana 'Miss Manila'	Pink	Fujian, China	Pink	Green
S7	Bougainvillea × buttiana 'Miss Manila'	Golden-Margined Pink	Taiwan, China	Pink	Golden-mottled leaves
S8	Bougainvillea × buttiana 'Miss Manila'	Rose Red	Fujian, China	Purplish red	Green
S9	Bougainvillea × buttiana 'Miss Manila'	Large Red Flower	Taiwan, China	National flag red	Green
S10	Bougainvillea × buttiana 'Miss Manila'	Multicolored Flower	India	Multi-colored per flower	Green
S11	Bougainvillea × buttiana 'Miss Manila'	Magic Color	India	Orange-pink splashed	Green
S12	Bougainvillea × buttiana 'Miss Manila'	Small Golden-Margined Red	Fujian, China	Small flowers, water red	Small golden-mottled leaves
S13	Bougainvillea × buttiana 'Miss Manila'	Medium Golden-Margined Red	Fujian, China	Water red	Medium golden-mottled leaves
S14	Bougainvillea × buttiana 'Miss Manila'	Large Golden-Margined Red	Fujian, China	Water red	Large golden-mottled leaves
S15	Bougainvillea × buttiana 'Miss Manila'	Golden-Leaf Red	Malaysia	Water red	Large golden leaves
S16	Bougainvillea × buttiana 'Miss Manila'	Brick Red	Guangdong, China	Water red	Sandy-mottled leaves
S17	Bougainvillea × buttiana 'Miss Manila'	Sandy Orange	Guangdong, China	Orange	Sandy-mottled leaves
S18	Bougainvillea × buttiana 'Miss Manila'	Golden-Leaf Red (Red-centered)	Guangdong, China	Water red	Golden-centered leaves
S19	Bougainvillea × buttiana 'Miss Manila'	Red September	Guangdong, China	Pink-mottled	Golden-margined, crinkled leaves
S20	Bougainvillea × buttiana 'Miss Manila'	Orange September	Guangdong, China	Yellow-orange mottled	Golden-margined, crinkled leaves
S21	Bougainvillea × buttiana 'Miss Manila'	Water September	Guangdong, China	Deep rose	Green, crinkled leaves
S22	Bougainvillea × buttiana 'Miss Manila'	Polyploid Red	Taiwan, China	Large flowers, bright red	Large leaves
S23	Bougainvillea × buttiana 'Miss Manila'	Polyploid Rose Red	Taiwan, China	Large flowers, rose red	Large leaves
S24	Bougainvillea × buttiana 'Miss Manila'	Polyploid Golden-Centered Red	Taiwan, China	Water red	Golden-centered mottled leaves
S25	Bougainvillea × buttiana 'Miss Manila'	White with Orange Edges	India	White flowers with orange margins	Green
S26	Bougainvillea × buttiana 'Miss Manila'	Sandy-Mottled Pink	Fujian, China	Pink	Sandy-mottled leaves
S27	Bougainvillea × buttiana 'Miss Manila'	Golden Leaf	Philippines	Yellow	Golden leaves
SJM145-1	Bougainvillea × buttiana 'Miss Manila'	Tong'an Red	Fujian, China	Water red	Green
SJM178-1	Bougainvillea spectabilis 'Pink'	Hairy-Leaf Pink	Fujian, China	Orange-pink	Hairy green leaves
SJM013-1	Bougainvillea spectabilis 'Green Ice'	Green Cherry	Fujian, China	Light green flowers with light pink margins	Green
SJM67	Bougainvillea 'Josephine Fifina Purple'	Josephine Fifi Purple	Fujian, China	Magenta	Green
SJM139	Bougainvillea spectabilis 'Variegata'	Pictorial	Guangdong, China	Multi-colored (per plant & per flower)	Large green leaves
SJM135	Bougainvillea × buttiana 'Manila Magic Pink'	Yijing	Guangdong, China	Double-petaled; white flowers with pink margins	Green
SJM131	Bougainvillea spectabilis 'Kasumi'	Tower Orange	Guangdong, China	Tower-shaped; orange-pink	Small green leaves
SJM271-1	Bougainvillea glabra 'Sao Paulo'	Small-Leaf Purple	Fujian, China	Purple	Green
SJM144-1	Bougainvillea glabra 'Eva'	Silver-Margined Light Purple	Yunnan, China	Purple	Silver-mottled leaves
SJM128	Bougainvillea glabra 'Formosa'	Formosa	Fujian, China	Light purple	Green
SJM104	Bougainvillea spectabilis 'Flame'	Flame	Fujian, China	Bright red	Green
SJM135	Bougainvillea glabra 'Sanderiana'	Sanderiana	Fujian, China	Purple	Green

## Sheet: Table S2
Table S2 The sequencing data for 39 Bougainvillea 'Miss Manila' samples.
Samples	Raw_Reads	Clean_Reads	Clean_Reads_Percent	Raw_Base	Clean_Base	Clean_Base_Percent	GC_Content	>Q20	>Q30
S1	5851776	5607958	0.9583	863136960	729034540	0.8446	0.4028	0.9753	0.9324
S10	5974212	5622084	0.9411	881196270	730870920	0.8294	0.4541	0.976	0.9342
S11	5899234	5620910	0.9528	870137015	730718300	0.8398	0.4495	0.9769	0.9359
S12	5842286	5358210	0.9171	861737185	696567300	0.8083	0.4454	0.9745	0.9303
S13	5520054	5327786	0.9652	814207965	692612180	0.8507	0.4037	0.9748	0.931
S14	5297448	5077740	0.9585	781373580	660106200	0.8448	0.4281	0.9749	0.9316
S15	5884890	5494434	0.9337	868021275	714276420	0.8229	0.4128	0.9754	0.9324
S16	6126070	5823444	0.9506	903595325	757047720	0.8378	0.4273	0.976	0.934
S17	5587982	5180142	0.927	824227345	673418460	0.817	0.3976	0.9743	0.9301
S18	5645774	5369764	0.9511	832751665	698069320	0.8383	0.4192	0.9748	0.9309
S19	4250640	3930006	0.9246	626969400	510900780	0.8149	0.4182	0.9744	0.9305
S2	5694986	5254994	0.9227	840010435	683149220	0.8133	0.3971	0.9732	0.9278
S20	6013422	5530250	0.9197	886979745	718932500	0.8105	0.4088	0.975	0.9317
S21	5497136	5127318	0.9327	810827560	666551340	0.8221	0.4335	0.9752	0.9322
S22	5503248	5234122	0.9511	811729080	680435860	0.8383	0.4335	0.9756	0.9334
S23	5805158	5468602	0.942	853358226	710918260	0.8331	0.4643	0.9768	0.9362
S24	5687500	5256886	0.9243	836062500	683395180	0.8174	0.4301	0.9753	0.9326
S25	5715346	5271030	0.9223	840155862	685233900	0.8156	0.4011	0.9752	0.9324
S26	5102928	4676968	0.9165	750130416	608005840	0.8105	0.4018	0.974	0.9296
S27	5544276	5152434	0.9293	815008572	669816420	0.8219	0.4048	0.9754	0.9325
S3	6574250	6166268	0.9379	969701875	801614840	0.8267	0.4821	0.9784	0.9396
S4	6096364	5598846	0.9184	899213690	727849980	0.8094	0.4064	0.9754	0.9327
S5	5800868	5342414	0.921	855628030	694513820	0.8117	0.3997	0.9746	0.9308
S6	5434896	5124192	0.9428	801647160	666144960	0.831	0.3985	0.9744	0.9302
S7	5484324	5054560	0.9216	808937790	657092800	0.8123	0.4125	0.9753	0.9325
S8	5385316	5175896	0.9611	794334110	672866480	0.8471	0.4178	0.9751	0.9315
S9	6322096	6027018	0.9533	932509160	783512340	0.8402	0.4381	0.9767	0.936
SJM013-1	13524464	13192808	0.9755	1981333976	1715065040	0.8656	0.4228	0.9593	0.8974
SJM104	4840032	4730240	0.9773	709064688	614931200	0.8672	0.4039	0.9527	0.8822
SJM128	4775658	4693980	0.9829	702021726	610217400	0.8692	0.3906	0.9548	0.8863
SJM131	5103330	4822926	0.9451	747637845	626980380	0.8386	0.3928	0.955	0.8869
SJM135-1	17934332	17524220	0.9771	2627379638	2278148600	0.8671	0.451	0.9624	0.9037
SJM139	4940030	4845470	0.9809	723714395	629911100	0.8704	0.3914	0.9527	0.8822
SJM144-1	16900202	15717848	0.93	2475879593	2043320240	0.8253	0.3991	0.9626	0.9042
SJM145-1	15015616	14652636	0.9758	2199787744	1904842680	0.8659	0.3978	0.9579	0.8947
SJM178-1	15114212	14774406	0.9775	2214232058	1920672780	0.8674	0.3924	0.9581	0.8946
SJM271-1	14175262	13253408	0.935	2076675883	1722943040	0.8297	0.3905	0.9567	0.8924
SJM35	4993810	4907636	0.9827	734090070	637992680	0.8691	0.3931	0.955	0.8866
SJM67	4466512	4227366	0.9465	654344008	549557580	0.8399	0.3922	0.9542	0.885

## Sheet: Table S3
Table S3 Significantly differentiated genes between bud sport and conventional populations.
List of genes with significant allele frequency differences between bud sport and conventional populations (FDR < 0.01). Gene: Gene identifier. Mutated (Bud/Conv): Number of individuals with a mutation in the gene within the bud sport or conventional group. Total (Bud/Conv): Total number of individuals assayed in the bud sport or conventional group. Freq (Bud/Conv): Mutation frequency (Mutated/To…
Gene	Mutated (Bud)	Mutated (Conv)	Total (Bud)	Total (Conv)	Freq (Bud)	Freq (Conv)	Freq Diff	Odds Ratio	P-value	Total Mutations	FDR	Significant	Description
Bou_96858	0	10	27	12	0	0.833333	-0.833333	0	1.03815e-07	25	9.69114e-05	TRUE	#N/A
Bou_129238	0	10	27	12	0	0.833333	-0.833333	0	1.03815e-07	15	9.69114e-05	TRUE	#N/A
Bou_105951	0	10	27	12	0	0.833333	-0.833333	0	1.03815e-07	23	9.69114e-05	TRUE	K15691 E3 ubiquitin-protein ligase RFWD3
Bou_9911	0	10	27	12	0	0.833333	-0.833333	0	1.03815e-07	55	9.69114e-05	TRUE	#N/A
Bou_65905	4	11	27	12	0.148148	0.916667	-0.768519	0.0158103	8.49315e-06	33	0.000400861	TRUE	transmembrane protein 64-like
Bou_29416	2	10	27	12	0.0740741	0.833333	-0.759259	0.016	6.0067e-06	23	0.000385161	TRUE	Carboxylesterase
Bou_16481	2	10	27	12	0.0740741	0.833333	-0.759259	0.016	6.0067e-06	41	0.000385161	TRUE	ntmc2t4,ntmc2type4
Bou_74894	2	10	27	12	0.0740741	0.833333	-0.759259	0.016	6.0067e-06	16	0.000385161	TRUE	K14827 pre-rRNA-processing protein IPI1
Bou_27687	0	9	27	12	0	0.75	-0.75	0	1.03815e-06	32	0.000138445	TRUE	K02265 cytochrome c oxidase subunit 5b
Bou_133689	0	9	27	12	0	0.75	-0.75	0	1.03815e-06	38	0.000138445	TRUE	K05756 actin related protein 2/3 complex, subunit 3
Bou_112008	0	9	27	12	0	0.75	-0.75	0	1.03815e-06	39	0.000138445	TRUE	K12180 COP9 signalosome complex subunit 7
Bou_13878	0	9	27	12	0	0.75	-0.75	0	1.03815e-06	20	0.000138445	TRUE	#N/A
Bou_142271	0	9	27	12	0	0.75	-0.75	0	1.03815e-06	35	0.000138445	TRUE	K03132 transcription initiation factor TFIID subunit 7
Bou_120546	0	9	27	12	0	0.75	-0.75	0	1.03815e-06	24	0.000138445	TRUE	Belongs to the AAA ATPase family
Bou_145195	0	9	27	12	0	0.75	-0.75	0	1.03815e-06	11	0.000138445	TRUE	Protein FAR1-RELATED SEQUENCE
Bou_32116	0	9	27	12	0	0.75	-0.75	0	1.03815e-06	22	0.000138445	TRUE	K11838 ubiquitin carboxyl-terminal hydrolase 7
Bou_97438	0	9	27	12	0	0.75	-0.75	0	1.03815e-06	28	0.000138445	TRUE	BTB POZ domain-containing protein
Bou_17289	0	9	27	12	0	0.75	-0.75	0	1.03815e-06	12	0.000138445	TRUE	Binds specifically to cytosolic chaperonin (c-CPN) and transfers target proteins to it. Binds to nascent polypeptide chain and promotes folding in an environment in which there are many competing pathways for nonnative proteins
Bou_93361	0	9	27	12	0	0.75	-0.75	0	1.03815e-06	33	0.000138445	TRUE	MATH domain-containing protein
Bou_126770	0	9	27	12	0	0.75	-0.75	0	1.03815e-06	20	0.000138445	TRUE	#N/A
Bou_33261	0	9	27	12	0	0.75	-0.75	0	1.03815e-06	23	0.000138445	TRUE	K14638 solute carrier family 15 (peptide/histidine transporter), member 3/4
Bou_82283	0	9	27	12	0	0.75	-0.75	0	1.03815e-06	44	0.000138445	TRUE	K18468 vacuolar protein sorting-associated protein 35
Bou_116104	0	9	27	12	0	0.75	-0.75	0	1.03815e-06	21	0.000138445	TRUE	K09284 AP2-like factor, euAP2 lineage
Bou_130704	0	9	27	12	0	0.75	-0.75	0	1.03815e-06	14	0.000138445	TRUE	K07151 dolichyl-diphosphooligosaccharide--protein glycosyltransferase
Bou_38793	0	9	27	12	0	0.75	-0.75	0	1.03815e-06	26	0.000138445	TRUE	K00873 pyruvate kinase
Bou_26315	0	9	27	12	0	0.75	-0.75	0	1.03815e-06	55	0.000138445	TRUE	#N/A
Bou_131321	0	9	27	12	0	0.75	-0.75	0	1.03815e-06	42	0.000138445	TRUE	K04650 nuclear receptor co-repressor 1
Bou_78094	0	9	27	12	0	0.75	-0.75	0	1.03815e-06	12	0.000138445	TRUE	K01869 leucyl-tRNA synthetase
Bou_131480	0	9	27	12	0	0.75	-0.75	0	1.03815e-06	29	0.000138445	TRUE	K10609 cullin 4
Bou_4805	0	9	27	12	0	0.75	-0.75	0	1.03815e-06	27	0.000138445	TRUE	#N/A
Bou_26455	0	9	27	12	0	0.75	-0.75	0	1.03815e-06	31	0.000138445	TRUE	K10406 kinesin family member C2/C3
Bou_142293	7	12	27	12	0.259259	1	-0.740741	0	1.28843e-05	30	0.000540563	TRUE	-
Bou_13090	5	11	27	12	0.185185	0.916667	-0.731481	0.0206612	2.61543e-05	31	0.000986465	TRUE	SET domain-containing protein
Bou_34576	5	11	27	12	0.185185	0.916667	-0.731481	0.0206612	2.61543e-05	37	0.000986465	TRUE	Activating signal cointegrator
Bou_100022	5	11	27	12	0.185185	0.916667	-0.731481	0.0206612	2.61543e-05	40	0.000986465	TRUE	K11592 endoribonuclease Dicer
Bou_53601	5	11	27	12	0.185185	0.916667	-0.731481	0.0206612	2.61543e-05	38	0.000986465	TRUE	Belongs to the ABC transporter superfamily. ABCG family. PDR (TC 3.A.1.205) subfamily
Bou_150384	5	11	27	12	0.185185	0.916667	-0.731481	0.0206612	2.61543e-05	57	0.000986465	TRUE	#N/A
Bou_124997	3	10	27	12	0.111111	0.833333	-0.722222	0.025	2.42894e-05	53	0.000964858	TRUE	-
Bou_93449	3	10	27	12	0.111111	0.833333	-0.722222	0.025	2.42894e-05	58	0.000964858	TRUE	K20306 trafficking protein particle complex subunit 9
Bou_62057	3	10	27	12	0.111111	0.833333	-0.722222	0.025	2.42894e-05	51	0.000964858	TRUE	HEAT repeat-containing protein
Bou_23902	3	10	27	12	0.111111	0.833333	-0.722222	0.025	2.42894e-05	16	0.000964858	TRUE	Histidine kinase
Bou_75074	3	10	27	12	0.111111	0.833333	-0.722222	0.025	2.42894e-05	17	0.000964858	TRUE	K01823 isopentenyl-diphosphate Delta-isomerase
Bou_40579	1	9	27	12	0.037037	0.75	-0.712963	0.0128205	9.44718e-06	11	0.000400861	TRUE	serine threonine-protein kinase
Bou_86180	1	9	27	12	0.037037	0.75	-0.712963	0.0128205	9.44718e-06	26	0.000400861	TRUE	K05658 ATP-binding cassette, subfamily B (MDR/TAP), member 1
Bou_3578	1	9	27	12	0.037037	0.75	-0.712963	0.0128205	9.44718e-06	34	0.000400861	TRUE	K11131 H/ACA ribonucleoprotein complex subunit 4
Bou_3838	1	9	27	12	0.037037	0.75	-0.712963	0.0128205	9.44718e-06	53	0.000400861	TRUE	K15559 regulator of Ty1 transposition protein 103
Bou_41872	1	9	27	12	0.037037	0.75	-0.712963	0.0128205	9.44718e-06	43	0.000400861	TRUE	EXORDIUM-like
Bou_15637	1	9	27	12	0.037037	0.75	-0.712963	0.0128205	9.44718e-06	14	0.000400861	TRUE	K15201 general transcription factor 3C polypeptide 3 (transcription factor C subunit 4)
Bou_9496	1	9	27	12	0.037037	0.75	-0.712963	0.0128205	9.44718e-06	24	0.000400861	TRUE	K15446 tRNA:m4X modification enzyme
Bou_61456	1	9	27	12	0.037037	0.75	-0.712963	0.0128205	9.44718e-06	31	0.000400861	TRUE	#N/A
Bou_107580	8	12	27	12	0.296296	1	-0.703704	0	4.50952e-05	56	0.00113101	TRUE	embryonic placenta development
Bou_37916	6	11	27	12	0.222222	0.916667	-0.694444	0.025974	7.12029e-05	78	0.00135649	TRUE	Folate-Biopterin Transporter
Bou_15321	6	11	27	12	0.222222	0.916667	-0.694444	0.025974	7.12029e-05	94	0.00135649	TRUE	K11498 centromeric protein E
Bou_94628	6	11	27	12	0.222222	0.916667	-0.694444	0.025974	7.12029e-05	32	0.00135649	TRUE	Possibly involved in carbohydrate binding
Bou_96082	6	11	27	12	0.222222	0.916667	-0.694444	0.025974	7.12029e-05	109	0.00135649	TRUE	#N/A
Bou_32898	6	11	27	12	0.222222	0.916667	-0.694444	0.025974	7.12029e-05	46	0.00135649	TRUE	K00130 betaine-aldehyde dehydrogenase
Bou_133451	6	11	27	12	0.222222	0.916667	-0.694444	0.025974	7.12029e-05	68	0.00135649	TRUE	K02350 DNA polymerase zeta
Bou_97669	6	11	27	12	0.222222	0.916667	-0.694444	0.025974	7.12029e-05	46	0.00135649	TRUE	K03097 casein kinase II subunit alpha
Bou_124578	6	11	27	12	0.222222	0.916667	-0.694444	0.025974	7.12029e-05	60	0.00135649	TRUE	K00705 4-alpha-glucanotransferase
Bou_30293	4	10	27	12	0.148148	0.833333	-0.685185	0.0347826	7.91376e-05	46	0.00146258	TRUE	K13248 pyridoxal phosphate phosphatase PHOSPHO2
Bou_118369	4	10	27	12	0.148148	0.833333	-0.685185	0.0347826	7.91376e-05	14	0.00146258	TRUE	Belongs to the UDP-glycosyltransferase family
Bou_104723	4	10	27	12	0.148148	0.833333	-0.685185	0.0347826	7.91376e-05	75	0.00146258	TRUE	#N/A
Bou_12385	4	10	27	12	0.148148	0.833333	-0.685185	0.0347826	7.91376e-05	70	0.00146258	TRUE	#N/A
Bou_14759	4	10	27	12	0.148148	0.833333	-0.685185	0.0347826	7.91376e-05	33	0.00146258	TRUE	#N/A
Bou_10496	2	9	27	12	0.0740741	0.75	-0.675926	0.0266667	4.71428e-05	33	0.00113101	TRUE	#N/A
Bou_61839	2	9	27	12	0.0740741	0.75	-0.675926	0.0266667	4.71428e-05	32	0.00113101	TRUE	isoform X1
Bou_85373	2	9	27	12	0.0740741	0.75	-0.675926	0.0266667	4.71428e-05	32	0.00113101	TRUE	K01262 Xaa-Pro aminopeptidase
Bou_9932	9	12	27	12	0.333333	1	-0.666667	0	7.99054e-05	122	0.00146258	TRUE	Belongs to the UDP-glycosyltransferase family
Bou_127951	9	12	27	12	0.333333	1	-0.666667	0	7.99054e-05	34	0.00146258	TRUE	K09667 protein O-GlcNAc transferase
Bou_33153	0	8	27	12	0	0.666667	-0.666667	0	8.04567e-06	24	0.000385161	TRUE	calcium-dependent protein kinase
Bou_26625	0	8	27	12	0	0.666667	-0.666667	0	8.04567e-06	20	0.000385161	TRUE	ELM2 domain-containing protein
Bou_60917	0	8	27	12	0	0.666667	-0.666667	0	8.04567e-06	17	0.000385161	TRUE	#N/A
Bou_87563	0	8	27	12	0	0.666667	-0.666667	0	8.04567e-06	30	0.000385161	TRUE	AP2-like ethylene-responsive transcription factor
Bou_90993	0	8	27	12	0	0.666667	-0.666667	0	8.04567e-06	30	0.000385161	TRUE	#N/A
Bou_32707	0	8	27	12	0	0.666667	-0.666667	0	8.04567e-06	50	0.000385161	TRUE	K14303 nuclear pore complex protein Nup160
Bou_56858	0	8	27	12	0	0.666667	-0.666667	0	8.04567e-06	38	0.000385161	TRUE	#N/A
Bou_63247	0	8	27	12	0	0.666667	-0.666667	0	8.04567e-06	8	0.000385161	TRUE	R3H domain-containing protein
Bou_120231	0	8	27	12	0	0.666667	-0.666667	0	8.04567e-06	29	0.000385161	TRUE	Protein kinase superfamily protein with octicosapeptide Phox Bem1p domain
Bou_139631	0	8	27	12	0	0.666667	-0.666667	0	8.04567e-06	36	0.000385161	TRUE	K00231 protoporphyrinogen/coproporphyrinogen III oxidase
Bou_44962	0	8	27	12	0	0.666667	-0.666667	0	8.04567e-06	29	0.000385161	TRUE	Transmembrane protein 115-like
Bou_75187	0	8	27	12	0	0.666667	-0.666667	0	8.04567e-06	59	0.000385161	TRUE	Squamosa promoter-binding-like protein
Bou_20955	0	8	27	12	0	0.666667	-0.666667	0	8.04567e-06	22	0.000385161	TRUE	G-type lectin S-receptor-like serine threonine-protein kinase
Bou_117369	0	8	27	12	0	0.666667	-0.666667	0	8.04567e-06	24	0.000385161	TRUE	K14772 U3 small nucleolar RNA-associated protein 20
Bou_15540	0	8	27	12	0	0.666667	-0.666667	0	8.04567e-06	10	0.000385161	TRUE	binding protein 2c
Bou_128948	0	8	27	12	0	0.666667	-0.666667	0	8.04567e-06	14	0.000385161	TRUE	K10357 myosin V
Bou_64229	0	8	27	12	0	0.666667	-0.666667	0	8.04567e-06	25	0.000385161	TRUE	#N/A
Bou_84704	0	8	27	12	0	0.666667	-0.666667	0	8.04567e-06	46	0.000385161	TRUE	K11699 RNA-dependent RNA polymerase
Bou_21111	0	8	27	12	0	0.666667	-0.666667	0	8.04567e-06	17	0.000385161	TRUE	#N/A
Bou_137941	0	8	27	12	0	0.666667	-0.666667	0	8.04567e-06	13	0.000385161	TRUE	Belongs to the glycosyl hydrolase 17 family
Bou_101612	0	8	27	12	0	0.666667	-0.666667	0	8.04567e-06	31	0.000385161	TRUE	K04646 clathrin heavy chain
Bou_67987	0	8	27	12	0	0.666667	-0.666667	0	8.04567e-06	10	0.000385161	TRUE	mediator of RNA polymerase II transcription subunit
Bou_63915	0	8	27	12	0	0.666667	-0.666667	0	8.04567e-06	19	0.000385161	TRUE	K14442 ATP-dependent RNA helicase DHX36
Bou_12422	0	8	27	12	0	0.666667	-0.666667	0	8.04567e-06	38	0.000385161	TRUE	K16276 zinc finger protein-like protein
Bou_98833	0	8	27	12	0	0.666667	-0.666667	0	8.04567e-06	40	0.000385161	TRUE	-
Bou_45661	0	8	27	12	0	0.666667	-0.666667	0	8.04567e-06	58	0.000385161	TRUE	receptor-like serine threonine-protein kinase
Bou_106770	0	8	27	12	0	0.666667	-0.666667	0	8.04567e-06	23	0.000385161	TRUE	K15501 serine/threonine-protein phosphatase 6 regulatory subunit 3
Bou_128822	0	8	27	12	0	0.666667	-0.666667	0	8.04567e-06	40	0.000385161	TRUE	-
Bou_93356	0	8	27	12	0	0.666667	-0.666667	0	8.04567e-06	31	0.000385161	TRUE	K00278 L-aspartate oxidase
Bou_90024	0	8	27	12	0	0.666667	-0.666667	0	8.04567e-06	43	0.000385161	TRUE	Domain of unknown function (DUF3598)
Bou_61313	0	8	27	12	0	0.666667	-0.666667	0	8.04567e-06	26	0.000385161	TRUE	#N/A
Bou_10356	0	8	27	12	0	0.666667	-0.666667	0	8.04567e-06	8	0.000385161	TRUE	#N/A
Bou_29646	0	8	27	12	0	0.666667	-0.666667	0	8.04567e-06	18	0.000385161	TRUE	#N/A
Bou_147334	0	8	27	12	0	0.666667	-0.666667	0	8.04567e-06	26	0.000385161	TRUE	K03680 translation initiation factor eIF-2B subunit delta
Bou_104235	0	8	27	12	0	0.666667	-0.666667	0	8.04567e-06	20	0.000385161	TRUE	K01568 pyruvate decarboxylase
Bou_74177	0	8	27	12	0	0.666667	-0.666667	0	8.04567e-06	17	0.000385161	TRUE	#N/A
Bou_82232	0	8	27	12	0	0.666667	-0.666667	0	8.04567e-06	14	0.000385161	TRUE	K09873 aquaporin TIP
Bou_53494	0	8	27	12	0	0.666667	-0.666667	0	8.04567e-06	58	0.000385161	TRUE	Integral membrane protein TerC family
Bou_78209	0	8	27	12	0	0.666667	-0.666667	0	8.04567e-06	20	0.000385161	TRUE	#N/A
Bou_106318	0	8	27	12	0	0.666667	-0.666667	0	8.04567e-06	21	0.000385161	TRUE	#N/A
Bou_84167	0	8	27	12	0	0.666667	-0.666667	0	8.04567e-06	34	0.000385161	TRUE	K03686 molecular chaperone DnaJ
Bou_785	0	8	27	12	0	0.666667	-0.666667	0	8.04567e-06	22	0.000385161	TRUE	#N/A
Bou_131222	0	8	27	12	0	0.666667	-0.666667	0	8.04567e-06	54	0.000385161	TRUE	K09338 homeobox-leucine zipper protein
Bou_5208	0	8	27	12	0	0.666667	-0.666667	0	8.04567e-06	15	0.000385161	TRUE	K00858 NAD+ kinase
Bou_113754	0	8	27	12	0	0.666667	-0.666667	0	8.04567e-06	18	0.000385161	TRUE	K00261 glutamate dehydrogenase (NAD(P)+)
Bou_86196	0	8	27	12	0	0.666667	-0.666667	0	8.04567e-06	17	0.000385161	TRUE	transporter arsB
Bou_11355	0	8	27	12	0	0.666667	-0.666667	0	8.04567e-06	33	0.000385161	TRUE	Belongs to the adaptor complexes small subunit family
Bou_79506	7	11	27	12	0.259259	0.916667	-0.657407	0.0318182	0.000250792	37	0.0029705	TRUE	Man1-Src1p-C-terminal domain
Bou_123682	7	11	27	12	0.259259	0.916667	-0.657407	0.0318182	0.000250792	55	0.0029705	TRUE	Protein present in Fab1, YOTB, Vac1, and EEA1
Bou_107558	7	11	27	12	0.259259	0.916667	-0.657407	0.0318182	0.000250792	47	0.0029705	TRUE	14 kDa proline-rich protein
Bou_78875	7	11	27	12	0.259259	0.916667	-0.657407	0.0318182	0.000250792	21	0.0029705	TRUE	K03403 magnesium chelatase subunit H
Bou_146162.1	7	11	27	12	0.259259	0.916667	-0.657407	0.0318182	0.000250792	73	0.0029705	TRUE	K09391 transcription factor E2F7/8
Bou_50785	7	11	27	12	0.259259	0.916667	-0.657407	0.0318182	0.000250792	37	0.0029705	TRUE	K00921 1-phosphatidylinositol-3-phosphate 5-kinase
Bou_63576	7	11	27	12	0.259259	0.916667	-0.657407	0.0318182	0.000250792	102	0.0029705	TRUE	K00854 xylulokinase
Bou_98583	7	11	27	12	0.259259	0.916667	-0.657407	0.0318182	0.000250792	91	0.0029705	TRUE	K01301 N-acetylated-alpha-linked acidic dipeptidase
Bou_83592	7	11	27	12	0.259259	0.916667	-0.657407	0.0318182	0.000250792	57	0.0029705	TRUE	K11450 lysine-specific histone demethylase 1A
Bou_52539	5	10	27	12	0.185185	0.833333	-0.648148	0.0454545	0.000220426	51	0.0029705	TRUE	ABC transporter G family member
Bou_71279	5	10	27	12	0.185185	0.833333	-0.648148	0.0454545	0.000220426	47	0.0029705	TRUE	D-ala D-ala ligase N-terminus
Bou_95444	5	10	27	12	0.185185	0.833333	-0.648148	0.0454545	0.000220426	29	0.0029705	TRUE	K06130 lysophospholipase II
Bou_11870	5	10	27	12	0.185185	0.833333	-0.648148	0.0454545	0.000220426	53	0.0029705	TRUE	DEAD-box ATP-dependent RNA helicase
Bou_120920	5	10	27	12	0.185185	0.833333	-0.648148	0.0454545	0.000220426	62	0.0029705	TRUE	#N/A
Bou_118399	5	10	27	12	0.185185	0.833333	-0.648148	0.0454545	0.000220426	34	0.0029705	TRUE	serine threonine-protein kinase
Bou_148254	5	10	27	12	0.185185	0.833333	-0.648148	0.0454545	0.000220426	43	0.0029705	TRUE	Mitochondrial fission protein
Bou_61148	5	10	27	12	0.185185	0.833333	-0.648148	0.0454545	0.000220426	37	0.0029705	TRUE	K05758 actin related protein 2/3 complex, subunit 2
Bou_3972	5	10	27	12	0.185185	0.833333	-0.648148	0.0454545	0.000220426	34	0.0029705	TRUE	-
Bou_21973	5	10	27	12	0.185185	0.833333	-0.648148	0.0454545	0.000220426	34	0.0029705	TRUE	domain-containing protein
Bou_10888	5	10	27	12	0.185185	0.833333	-0.648148	0.0454545	0.000220426	72	0.0029705	TRUE	-
Bou_76128	5	10	27	12	0.185185	0.833333	-0.648148	0.0454545	0.000220426	42	0.0029705	TRUE	membrane protein At3g27390
Bou_29846	5	10	27	12	0.185185	0.833333	-0.648148	0.0454545	0.000220426	63	0.0029705	TRUE	#N/A
Bou_39154	5	10	27	12	0.185185	0.833333	-0.648148	0.0454545	0.000220426	18	0.0029705	TRUE	K06700 proteasome inhibitor subunit 1 (PI31)
Bou_20189	5	10	27	12	0.185185	0.833333	-0.648148	0.0454545	0.000220426	16	0.0029705	TRUE	K01883 cysteinyl-tRNA synthetase
Bou_129785	5	10	27	12	0.185185	0.833333	-0.648148	0.0454545	0.000220426	107	0.0029705	TRUE	K05658 ATP-binding cassette, subfamily B (MDR/TAP), member 1
Bou_53298	5	10	27	12	0.185185	0.833333	-0.648148	0.0454545	0.000220426	60	0.0029705	TRUE	Aminoacyl tRNA synthase complex-interacting multifunctional protein
Bou_11442	5	10	27	12	0.185185	0.833333	-0.648148	0.0454545	0.000220426	17	0.0029705	TRUE	#N/A
Bou_60834	5	10	27	12	0.185185	0.833333	-0.648148	0.0454545	0.000220426	17	0.0029705	TRUE	#N/A
Bou_73000	5	10	27	12	0.185185	0.833333	-0.648148	0.0454545	0.000220426	55	0.0029705	TRUE	Pentatricopeptide repeat-containing protein
Bou_29111	3	9	27	12	0.111111	0.75	-0.638889	0.0416667	0.000170551	26	0.00292128	TRUE	K17592 sacsin
Bou_37191	3	9	27	12	0.111111	0.75	-0.638889	0.0416667	0.000170551	53	0.00292128	TRUE	K14861 nucleolar pre-ribosomal-associated protein 1
Bou_43234	3	9	27	12	0.111111	0.75	-0.638889	0.0416667	0.000170551	75	0.00292128	TRUE	regulation of multicellular organismal development
Bou_104769	3	9	27	12	0.111111	0.75	-0.638889	0.0416667	0.000170551	26	0.00292128	TRUE	Zinc finger C-x8-C-x5-C-x3-H type (and similar)
Bou_96223	3	9	27	12	0.111111	0.75	-0.638889	0.0416667	0.000170551	35	0.00292128	TRUE	K18655 ATP-dependent RNA helicase DDX19/DBP5
Bou_109859	3	9	27	12	0.111111	0.75	-0.638889	0.0416667	0.000170551	35	0.00292128	TRUE	K17398 DNA (cytosine-5)-methyltransferase 3A
Bou_40507	3	9	27	12	0.111111	0.75	-0.638889	0.0416667	0.000170551	36	0.00292128	TRUE	K12591 exosome complex exonuclease RRP6
Bou_127258	3	9	27	12	0.111111	0.75	-0.638889	0.0416667	0.000170551	43	0.00292128	TRUE	K03013 DNA-directed RNA polymerases I, II, and III subunit RPABC1
Bou_88261	3	9	27	12	0.111111	0.75	-0.638889	0.0416667	0.000170551	46	0.00292128	TRUE	Domain of unknown function (DUF4336)
Bou_87506	3	9	27	12	0.111111	0.75	-0.638889	0.0416667	0.000170551	34	0.00292128	TRUE	mediator of RNA polymerase II transcription subunit
Bou_120736	3	9	27	12	0.111111	0.75	-0.638889	0.0416667	0.000170551	27	0.00292128	TRUE	K19027 zinc finger FYVE domain-containing protein 26
Bou_3269	3	9	27	12	0.111111	0.75	-0.638889	0.0416667	0.000170551	25	0.00292128	TRUE	K00522 ferritin heavy chain
Bou_17041	3	9	27	12	0.111111	0.75	-0.638889	0.0416667	0.000170551	54	0.00292128	TRUE	K01934 5-formyltetrahydrofolate cyclo-ligase
Bou_23191	1	8	27	12	0.037037	0.666667	-0.62963	0.0192308	6.41059e-05	30	0.00127325	TRUE	-
Bou_107194	1	8	27	12	0.037037	0.666667	-0.62963	0.0192308	6.41059e-05	18	0.00127325	TRUE	K06634 cyclin H
Bou_117726	1	8	27	12	0.037037	0.666667	-0.62963	0.0192308	6.41059e-05	18	0.00127325	TRUE	K02160 acetyl-CoA carboxylase biotin carboxyl carrier protein
Bou_83471	1	8	27	12	0.037037	0.666667	-0.62963	0.0192308	6.41059e-05	29	0.00127325	TRUE	K18469 TBC1 domain family member 5
Bou_130660	1	8	27	12	0.037037	0.666667	-0.62963	0.0192308	6.41059e-05	35	0.00127325	TRUE	K10591 E3 ubiquitin-protein ligase NEDD4
Bou_51803	1	8	27	12	0.037037	0.666667	-0.62963	0.0192308	6.41059e-05	28	0.00127325	TRUE	Inosine-uridine preferring nucleoside hydrolase
Bou_141343	1	8	27	12	0.037037	0.666667	-0.62963	0.0192308	6.41059e-05	21	0.00127325	TRUE	K03070 preprotein translocase subunit SecA
Bou_12963	1	8	27	12	0.037037	0.666667	-0.62963	0.0192308	6.41059e-05	60	0.00127325	TRUE	#N/A
Bou_62862	1	8	27	12	0.037037	0.666667	-0.62963	0.0192308	6.41059e-05	18	0.00127325	TRUE	HEAT repeat-containing protein
Bou_150770	1	8	27	12	0.037037	0.666667	-0.62963	0.0192308	6.41059e-05	18	0.00127325	TRUE	K10878 meiotic recombination protein SPO11
Bou_123709	1	8	27	12	0.037037	0.666667	-0.62963	0.0192308	6.41059e-05	32	0.00127325	TRUE	K02605 origin recognition complex subunit 3
Bou_96158	1	8	27	12	0.037037	0.666667	-0.62963	0.0192308	6.41059e-05	61	0.00127325	TRUE	Myb/SANT-like DNA-binding domain
Bou_21826	1	8	27	12	0.037037	0.666667	-0.62963	0.0192308	6.41059e-05	16	0.00127325	TRUE	K15103 solute carrier family 25 (mitochondrial uncoupling protein), member 8/9
Bou_69867	1	8	27	12	0.037037	0.666667	-0.62963	0.0192308	6.41059e-05	30	0.00127325	TRUE	K03283 heat shock 70kDa protein 1/8
Bou_87598	1	8	27	12	0.037037	0.666667	-0.62963	0.0192308	6.41059e-05	31	0.00127325	TRUE	K12115 clock-associated PAS protein ZTL
Bou_122972	1	8	27	12	0.037037	0.666667	-0.62963	0.0192308	6.41059e-05	13	0.00127325	TRUE	elicitor-responsive protein
Bou_47118	1	8	27	12	0.037037	0.666667	-0.62963	0.0192308	6.41059e-05	20	0.00127325	TRUE	K11374 elongator complex protein 2
Bou_101468	8	11	27	12	0.296296	0.916667	-0.62037	0.0382775	0.000431625	26	0.00380115	TRUE	membrane-associated kinase regulator 4
Bou_127071	8	11	27	12	0.296296	0.916667	-0.62037	0.0382775	0.000431625	27	0.00380115	TRUE	K14802 phospholipid-transporting ATPase
Bou_132979	8	11	27	12	0.296296	0.916667	-0.62037	0.0382775	0.000431625	46	0.00380115	TRUE	#N/A
Bou_149049	8	11	27	12	0.296296	0.916667	-0.62037	0.0382775	0.000431625	67	0.00380115	TRUE	K15332 tRNA (uracil-5-)-methyltransferase
Bou_111454	8	11	27	12	0.296296	0.916667	-0.62037	0.0382775	0.000431625	101	0.00380115	TRUE	K08776 puromycin-sensitive aminopeptidase
Bou_8398	8	11	27	12	0.296296	0.916667	-0.62037	0.0382775	0.000431625	68	0.00380115	TRUE	Belongs to the ABC transporter superfamily. ABCG family. PDR (TC 3.A.1.205) subfamily
Bou_132697	8	11	27	12	0.296296	0.916667	-0.62037	0.0382775	0.000431625	108	0.00380115	TRUE	#N/A
Bou_20840	8	11	27	12	0.296296	0.916667	-0.62037	0.0382775	0.000431625	92	0.00380115	TRUE	K02927 large subunit ribosomal protein L40e
Bou_42954	8	11	27	12	0.296296	0.916667	-0.62037	0.0382775	0.000431625	74	0.00380115	TRUE	K12385 Niemann-Pick C1 protein
Bou_97514	8	11	27	12	0.296296	0.916667	-0.62037	0.0382775	0.000431625	62	0.00380115	TRUE	K15559 regulator of Ty1 transposition protein 103
Bou_26030	8	11	27	12	0.296296	0.916667	-0.62037	0.0382775	0.000431625	53	0.00380115	TRUE	K13051 beta-aspartyl-peptidase (threonine type)
Bou_83653	8	11	27	12	0.296296	0.916667	-0.62037	0.0382775	0.000431625	35	0.00380115	TRUE	K11866 STAM-binding protein
Bou_6781	8	11	27	12	0.296296	0.916667	-0.62037	0.0382775	0.000431625	59	0.00380115	TRUE	mediator of RNA polymerase II transcription subunit
Bou_37603	8	11	27	12	0.296296	0.916667	-0.62037	0.0382775	0.000431625	47	0.00380115	TRUE	Poly(A) RNA polymerase
Bou_144529	8	11	27	12	0.296296	0.916667	-0.62037	0.0382775	0.000431625	24	0.00380115	TRUE	K05929 phosphoethanolamine N-methyltransferase
Bou_41954	8	11	27	12	0.296296	0.916667	-0.62037	0.0382775	0.000431625	45	0.00380115	TRUE	K12471 epsin
Bou_142257	8	11	27	12	0.296296	0.916667	-0.62037	0.0382775	0.000431625	64	0.00380115	TRUE	ENHANCER OF AG-4 protein
Bou_102104	8	11	27	12	0.296296	0.916667	-0.62037	0.0382775	0.000431625	63	0.00380115	TRUE	K00434 L-ascorbate peroxidase
Bou_106508	8	11	27	12	0.296296	0.916667	-0.62037	0.0382775	0.000431625	156	0.00380115	TRUE	#N/A
Bou_107608	8	11	27	12	0.296296	0.916667	-0.62037	0.0382775	0.000431625	78	0.00380115	TRUE	#N/A
Bou_23406	8	11	27	12	0.296296	0.916667	-0.62037	0.0382775	0.000431625	26	0.00380115	TRUE	serine threonine protein kinase IRE
Bou_136381	8	11	27	12	0.296296	0.916667	-0.62037	0.0382775	0.000431625	83	0.00380115	TRUE	#N/A
Bou_80113	8	11	27	12	0.296296	0.916667	-0.62037	0.0382775	0.000431625	84	0.00380115	TRUE	calmodulin-binding transcription activator
Bou_35844	8	11	27	12	0.296296	0.916667	-0.62037	0.0382775	0.000431625	42	0.00380115	TRUE	Protein CUP-SHAPED COTYLEDON
Bou_8409	8	11	27	12	0.296296	0.916667	-0.62037	0.0382775	0.000431625	44	0.00380115	TRUE	#N/A
Bou_37213.4	8	11	27	12	0.296296	0.916667	-0.62037	0.0382775	0.000431625	23	0.00380115	TRUE	K12489 Arf-GAP with coiled-coil, ANK repeat and PH domain-containing protein
Bou_30263	8	11	27	12	0.296296	0.916667	-0.62037	0.0382775	0.000431625	59	0.00380115	TRUE	K00029 malate dehydrogenase (oxaloacetate-decarboxylating)(NADP+)
Bou_36724	8	11	27	12	0.296296	0.916667	-0.62037	0.0382775	0.000431625	94	0.00380115	TRUE	K07766 diphosphoinositol-polyphosphate diphosphatase
Bou_79834	8	11	27	12	0.296296	0.916667	-0.62037	0.0382775	0.000431625	97	0.00380115	TRUE	alpha-galactosidase
Bou_41417	8	11	27	12	0.296296	0.916667	-0.62037	0.0382775	0.000431625	187	0.00380115	TRUE	K14327 regulator of nonsense transcripts 2
Bou_42939	8	11	27	12	0.296296	0.916667	-0.62037	0.0382775	0.000431625	31	0.00380115	TRUE	#N/A
Bou_142418	8	11	27	12	0.296296	0.916667	-0.62037	0.0382775	0.000431625	35	0.00380115	TRUE	Hydroxyproline-rich glycoprotein family protein
Bou_138975	8	11	27	12	0.296296	0.916667	-0.62037	0.0382775	0.000431625	112	0.00380115	TRUE	Pentatricopeptide repeat-containing protein
Bou_61076	8	11	27	12	0.296296	0.916667	-0.62037	0.0382775	0.000431625	25	0.00380115	TRUE	tRNA threonylcarbamoyladenosine
Bou_1815	8	11	27	12	0.296296	0.916667	-0.62037	0.0382775	0.000431625	53	0.00380115	TRUE	#N/A
Bou_64130	8	11	27	12	0.296296	0.916667	-0.62037	0.0382775	0.000431625	63	0.00380115	TRUE	K06699 proteasome activator subunit 4
Bou_148325	8	11	27	12	0.296296	0.916667	-0.62037	0.0382775	0.000431625	27	0.00380115	TRUE	K20098 DNA excision repair protein ERCC-6-like 2
Bou_134461	8	11	27	12	0.296296	0.916667	-0.62037	0.0382775	0.000431625	31	0.00380115	TRUE	#N/A
Bou_97120	8	11	27	12	0.296296	0.916667	-0.62037	0.0382775	0.000431625	58	0.00380115	TRUE	#N/A
Bou_19476	8	11	27	12	0.296296	0.916667	-0.62037	0.0382775	0.000431625	70	0.00380115	TRUE	transcription factor
Bou_21088	8	11	27	12	0.296296	0.916667	-0.62037	0.0382775	0.000431625	32	0.00380115	TRUE	-
Bou_82786	8	11	27	12	0.296296	0.916667	-0.62037	0.0382775	0.000431625	65	0.00380115	TRUE	#N/A
Bou_109413	8	11	27	12	0.296296	0.916667	-0.62037	0.0382775	0.000431625	21	0.00380115	TRUE	SPFH Band 7 PHB domain-containing membrane-associated protein family
Bou_56286	6	10	27	12	0.222222	0.833333	-0.611111	0.0571429	0.000889943	58	0.0073312	TRUE	Belongs to the chalcone isomerase family
Bou_33862	6	10	27	12	0.222222	0.833333	-0.611111	0.0571429	0.000889943	41	0.0073312	TRUE	#N/A
Bou_50553.1	6	10	27	12	0.222222	0.833333	-0.611111	0.0571429	0.000889943	88	0.0073312	TRUE	#N/A
Bou_55793	6	10	27	12	0.222222	0.833333	-0.611111	0.0571429	0.000889943	29	0.0073312	TRUE	K14782 protein AATF/BFR2
Bou_82538	6	10	27	12	0.222222	0.833333	-0.611111	0.0571429	0.000889943	27	0.0073312	TRUE	FLX-like 1
Bou_4155	6	10	27	12	0.222222	0.833333	-0.611111	0.0571429	0.000889943	51	0.0073312	TRUE	#N/A
Bou_63073	4	9	27	12	0.148148	0.75	-0.601852	0.057971	0.00049964	28	0.00420193	TRUE	polyamine transporter At3g13620
Bou_124757	4	9	27	12	0.148148	0.75	-0.601852	0.057971	0.00049964	38	0.00420193	TRUE	K09597 signal peptide peptidase-like 2B
Bou_15817	4	9	27	12	0.148148	0.75	-0.601852	0.057971	0.00049964	29	0.00420193	TRUE	K02180 cell cycle arrest protein BUB3
Bou_36230	4	9	27	12	0.148148	0.75	-0.601852	0.057971	0.00049964	24	0.00420193	TRUE	K01537 Ca2+-transporting ATPase
Bou_107887	4	9	27	12	0.148148	0.75	-0.601852	0.057971	0.00049964	57	0.00420193	TRUE	K10747 DNA ligase 1
Bou_126647	4	9	27	12	0.148148	0.75	-0.601852	0.057971	0.00049964	25	0.00420193	TRUE	K14692 solute carrier family 30 (zinc transporter), member 5/7
Bou_41674	4	9	27	12	0.148148	0.75	-0.601852	0.057971	0.00049964	58	0.00420193	TRUE	Leucine-rich repeat receptor-like protein kinase
Bou_10721	4	9	27	12	0.148148	0.75	-0.601852	0.057971	0.00049964	30	0.00420193	TRUE	#N/A
Bou_130808	4	9	27	12	0.148148	0.75	-0.601852	0.057971	0.00049964	27	0.00420193	TRUE	Pentatricopeptide repeat-containing protein
Bou_25297	4	9	27	12	0.148148	0.75	-0.601852	0.057971	0.00049964	19	0.00420193	TRUE	Pentatricopeptide repeat-containing protein
Bou_47962	4	9	27	12	0.148148	0.75	-0.601852	0.057971	0.00049964	59	0.00420193	TRUE	K01611 S-adenosylmethionine decarboxylase
Bou_47126	4	9	27	12	0.148148	0.75	-0.601852	0.057971	0.00049964	46	0.00420193	TRUE	TMEM192 family
Bou_77936	4	9	27	12	0.148148	0.75	-0.601852	0.057971	0.00049964	34	0.00420193	TRUE	Cell division cycle and apoptosis regulator protein
Bou_113431	4	9	27	12	0.148148	0.75	-0.601852	0.057971	0.00049964	61	0.00420193	TRUE	F-box kelch-repeat protein
Bou_17983	4	9	27	12	0.148148	0.75	-0.601852	0.057971	0.00049964	43	0.00420193	TRUE	K06125 4-hydroxybenzoate polyprenyltransferase
Bou_114462	4	9	27	12	0.148148	0.75	-0.601852	0.057971	0.00049964	24	0.00420193	TRUE	transcription factor
Bou_1608	2	8	27	12	0.0740741	0.666667	-0.592593	0.04	0.000282741	33	0.0029705	TRUE	MADS-box protein
Bou_29074	2	8	27	12	0.0740741	0.666667	-0.592593	0.04	0.000282741	34	0.0029705	TRUE	#N/A
Bou_57245	2	8	27	12	0.0740741	0.666667	-0.592593	0.04	0.000282741	28	0.0029705	TRUE	K19476 vacuolar protein sorting-associated protein IST1
Bou_117424	2	8	27	12	0.0740741	0.666667	-0.592593	0.04	0.000282741	33	0.0029705	TRUE	K01051 pectinesterase
Bou_40976	2	8	27	12	0.0740741	0.666667	-0.592593	0.04	0.000282741	30	0.0029705	TRUE	K12795 suppressor of G2 allele of SKP1
Bou_43830	2	8	27	12	0.0740741	0.666667	-0.592593	0.04	0.000282741	28	0.0029705	TRUE	K17065 dynamin 1-like protein
Bou_107694	11	12	27	12	0.407407	1	-0.592593	0	0.000371884	157	0.00364466	TRUE	phosphatase 2C
Bou_89252	0	7	27	12	0	0.583333	-0.583333	0	5.14923e-05	25	0.00113101	TRUE	#N/A
Bou_114183	0	7	27	12	0	0.583333	-0.583333	0	5.14923e-05	11	0.00113101	TRUE	K03263 translation initiation factor 5A
Bou_21122	0	7	27	12	0	0.583333	-0.583333	0	5.14923e-05	29	0.00113101	TRUE	K01626 3-deoxy-7-phosphoheptulonate synthase
Bou_87840	0	7	27	12	0	0.583333	-0.583333	0	5.14923e-05	9	0.00113101	TRUE	#N/A
Bou_24283	0	7	27	12	0	0.583333	-0.583333	0	5.14923e-05	43	0.00113101	TRUE	LRR receptor-like serine threonine-protein kinase
Bou_46194	0	7	27	12	0	0.583333	-0.583333	0	5.14923e-05	14	0.00113101	TRUE	Mitochondrial transcription termination factor family protein
Bou_137542	0	7	27	12	0	0.583333	-0.583333	0	5.14923e-05	31	0.00113101	TRUE	Peptidase family M48 family
Bou_52797	0	7	27	12	0	0.583333	-0.583333	0	5.14923e-05	41	0.00113101	TRUE	K02876 large subunit ribosomal protein L15
Bou_99073	0	7	27	12	0	0.583333	-0.583333	0	5.14923e-05	27	0.00113101	TRUE	Protein kinase and PP2C-like domain-containing
Bou_74986	0	7	27	12	0	0.583333	-0.583333	0	5.14923e-05	9	0.00113101	TRUE	Methyltransferase-like protein
Bou_61204	0	7	27	12	0	0.583333	-0.583333	0	5.14923e-05	35	0.00113101	TRUE	K15601 lysine-specific demethylase 3
Bou_87572	0	7	27	12	0	0.583333	-0.583333	0	5.14923e-05	16	0.00113101	TRUE	K14066 geranyl diphosphate synthase
Bou_40264	0	7	27	12	0	0.583333	-0.583333	0	5.14923e-05	12	0.00113101	TRUE	K11507 centromere protein O
Bou_97699	0	7	27	12	0	0.583333	-0.583333	0	5.14923e-05	27	0.00113101	TRUE	Belongs to the plant LTP family
Bou_59268	0	7	27	12	0	0.583333	-0.583333	0	5.14923e-05	7	0.00113101	TRUE	K09494 T-complex protein 1 subunit beta
Bou_94758	0	7	27	12	0	0.583333	-0.583333	0	5.14923e-05	22	0.00113101	TRUE	#N/A
Bou_56059	0	7	27	12	0	0.583333	-0.583333	0	5.14923e-05	21	0.00113101	TRUE	Serine threonine-protein kinase
Bou_1438	0	7	27	12	0	0.583333	-0.583333	0	5.14923e-05	7	0.00113101	TRUE	K00412 ubiquinol-cytochrome c reductase cytochrome b subunit
Bou_81799	0	7	27	12	0	0.583333	-0.583333	0	5.14923e-05	38	0.00113101	TRUE	#N/A
Bou_99725	0	7	27	12	0	0.583333	-0.583333	0	5.14923e-05	16	0.00113101	TRUE	K01803 triosephosphate isomerase (TIM)
Bou_70031	0	7	27	12	0	0.583333	-0.583333	0	5.14923e-05	47	0.00113101	TRUE	#N/A
Bou_81062	0	7	27	12	0	0.583333	-0.583333	0	5.14923e-05	14	0.00113101	TRUE	#N/A
Bou_81613	0	7	27	12	0	0.583333	-0.583333	0	5.14923e-05	27	0.00113101	TRUE	Nematode resistance protein-like
Bou_64840	0	7	27	12	0	0.583333	-0.583333	0	5.14923e-05	37	0.00113101	TRUE	Domain of unknown function (DUF3527)
Bou_128543	0	7	27	12	0	0.583333	-0.583333	0	5.14923e-05	27	0.00113101	TRUE	K05658 ATP-binding cassette, subfamily B (MDR/TAP), member 1
Bou_49107	0	7	27	12	0	0.583333	-0.583333	0	5.14923e-05	20	0.00113101	TRUE	Pentatricopeptide repeat-containing protein At3g53360
Bou_7790	0	7	27	12	0	0.583333	-0.583333	0	5.14923e-05	22	0.00113101	TRUE	K05350 beta-glucosidase
Bou_98736	0	7	27	12	0	0.583333	-0.583333	0	5.14923e-05	12	0.00113101	TRUE	IQ-domain
Bou_4164	0	7	27	12	0	0.583333	-0.583333	0	5.14923e-05	27	0.00113101	TRUE	Polyadenylate-binding protein-interacting protein
Bou_72527	0	7	27	12	0	0.583333	-0.583333	0	5.14923e-05	8	0.00113101	TRUE	K09529 DnaJ homolog subfamily C member 9
Bou_54387	0	7	27	12	0	0.583333	-0.583333	0	5.14923e-05	15	0.00113101	TRUE	Calcineurin-like phosphoesterase
Bou_60053	0	7	27	12	0	0.583333	-0.583333	0	5.14923e-05	15	0.00113101	TRUE	#N/A
Bou_138021	0	7	27	12	0	0.583333	-0.583333	0	5.14923e-05	16	0.00113101	TRUE	K14713 solute carrier family 39 (zinc transporter), member 7
Bou_142748	0	7	27	12	0	0.583333	-0.583333	0	5.14923e-05	19	0.00113101	TRUE	Hydroxyproline-rich glycoprotein family protein
Bou_111220	0	7	27	12	0	0.583333	-0.583333	0	5.14923e-05	17	0.00113101	TRUE	K03143 transcription initiation factor TFIIH subunit 3
Bou_110018	0	7	27	12	0	0.583333	-0.583333	0	5.14923e-05	22	0.00113101	TRUE	K03364 cell division cycle 20-like protein 1, cofactor of APC complex
Bou_27094	0	7	27	12	0	0.583333	-0.583333	0	5.14923e-05	27	0.00113101	TRUE	protein phosphatase 2C 12
Bou_56984	0	7	27	12	0	0.583333	-0.583333	0	5.14923e-05	56	0.00113101	TRUE	K13179 ATP-dependent RNA helicase DDX18/HAS1
Bou_59397	0	7	27	12	0	0.583333	-0.583333	0	5.14923e-05	10	0.00113101	TRUE	K13128 zinc finger CCHC domain-containing protein 8
Bou_134839	0	7	27	12	0	0.583333	-0.583333	0	5.14923e-05	10	0.00113101	TRUE	K01183 chitinase
Bou_58983	0	7	27	12	0	0.583333	-0.583333	0	5.14923e-05	17	0.00113101	TRUE	K07374 tubulin alpha
Bou_20232	0	7	27	12	0	0.583333	-0.583333	0	5.14923e-05	16	0.00113101	TRUE	Belongs to the major facilitator superfamily. Sugar transporter (TC 2.A.1.1) family
Bou_99741	0	7	27	12	0	0.583333	-0.583333	0	5.14923e-05	19	0.00113101	TRUE	K09522 DnaJ homolog subfamily C member 2
Bou_7487	0	7	27	12	0	0.583333	-0.583333	0	5.14923e-05	7	0.00113101	TRUE	-
Bou_122060	0	7	27	12	0	0.583333	-0.583333	0	5.14923e-05	63	0.00113101	TRUE	#N/A
Bou_28387	0	7	27	12	0	0.583333	-0.583333	0	5.14923e-05	38	0.00113101	TRUE	K00430 peroxidase
Bou_77599	0	7	27	12	0	0.583333	-0.583333	0	5.14923e-05	11	0.00113101	TRUE	K15109 solute carrier family 25 (mitochondrial carnitine/acylcarnitine transporter), member 20/29
Bou_67515	0	7	27	12	0	0.583333	-0.583333	0	5.14923e-05	36	0.00113101	TRUE	K14440 SWI/SNF-related matrix-associated actin-dependent regulator of chromatin subfamily A-like protein 1
Bou_82129	0	7	27	12	0	0.583333	-0.583333	0	5.14923e-05	19	0.00113101	TRUE	belongs to the protein kinase superfamily
Bou_79803	0	7	27	12	0	0.583333	-0.583333	0	5.14923e-05	21	0.00113101	TRUE	Pentatricopeptide repeat-containing protein At1g03100
Bou_119878	0	7	27	12	0	0.583333	-0.583333	0	5.14923e-05	18	0.00113101	TRUE	K14403 cleavage and polyadenylation specificity factor subunit 3
Bou_64307	0	7	27	12	0	0.583333	-0.583333	0	5.14923e-05	55	0.00113101	TRUE	#N/A
Bou_84122	0	7	27	12	0	0.583333	-0.583333	0	5.14923e-05	32	0.00113101	TRUE	K04681 retinoblastoma-like protein 1
Bou_131319	0	7	27	12	0	0.583333	-0.583333	0	5.14923e-05	24	0.00113101	TRUE	K17879 peroxisomal coenzyme A diphosphatase NUDT7
Bou_150084	0	7	27	12	0	0.583333	-0.583333	0	5.14923e-05	27	0.00113101	TRUE	K17839 polyamine oxidase
Bou_48987.1	0	7	27	12	0	0.583333	-0.583333	0	5.14923e-05	25	0.00113101	TRUE	K14303 nuclear pore complex protein Nup160
Bou_8141	0	7	27	12	0	0.583333	-0.583333	0	5.14923e-05	57	0.00113101	TRUE	-
Bou_99629	0	7	27	12	0	0.583333	-0.583333	0	5.14923e-05	30	0.00113101	TRUE	K01338 ATP-dependent Lon protease
Bou_79454	0	7	27	12	0	0.583333	-0.583333	0	5.14923e-05	27	0.00113101	TRUE	WD40-like Beta Propeller Repeat
Bou_123606	0	7	27	12	0	0.583333	-0.583333	0	5.14923e-05	49	0.00113101	TRUE	K03452 magnesium/proton exchanger
Bou_111225	0	7	27	12	0	0.583333	-0.583333	0	5.14923e-05	19	0.00113101	TRUE	#N/A
Bou_60985	0	7	27	12	0	0.583333	-0.583333	0	5.14923e-05	14	0.00113101	TRUE	#N/A
Bou_117520	9	11	27	12	0.333333	0.916667	-0.583333	0.0454545	0.00124763	46	0.00759571	TRUE	Chaperone protein dnaJ 1
Bou_65523	9	11	27	12	0.333333	0.916667	-0.583333	0.0454545	0.00124763	105	0.00759571	TRUE	#N/A
Bou_15926	9	11	27	12	0.333333	0.916667	-0.583333	0.0454545	0.00124763	73	0.00759571	TRUE	Belongs to the TRAFAC class dynamin-like GTPase superfamily. Dynamin Fzo YdjA family
Bou_11768	9	11	27	12	0.333333	0.916667	-0.583333	0.0454545	0.00124763	51	0.00759571	TRUE	K11446 histone demethylase JARID1
Bou_60334	9	11	27	12	0.333333	0.916667	-0.583333	0.0454545	0.00124763	36	0.00759571	TRUE	Belongs to the peptidase M16 family
Bou_109578	9	11	27	12	0.333333	0.916667	-0.583333	0.0454545	0.00124763	62	0.00759571	TRUE	#N/A
Bou_13940	9	11	27	12	0.333333	0.916667	-0.583333	0.0454545	0.00124763	87	0.00759571	TRUE	-
Bou_107166	9	11	27	12	0.333333	0.916667	-0.583333	0.0454545	0.00124763	89	0.00759571	TRUE	#N/A
Bou_13631	9	11	27	12	0.333333	0.916667	-0.583333	0.0454545	0.00124763	82	0.00759571	TRUE	#N/A
Bou_24064	9	11	27	12	0.333333	0.916667	-0.583333	0.0454545	0.00124763	76	0.00759571	TRUE	K12600 superkiller protein 3
Bou_121575	9	11	27	12	0.333333	0.916667	-0.583333	0.0454545	0.00124763	73	0.00759571	TRUE	amino acid transporter
Bou_141532	9	11	27	12	0.333333	0.916667	-0.583333	0.0454545	0.00124763	34	0.00759571	TRUE	#N/A
Bou_99938	9	11	27	12	0.333333	0.916667	-0.583333	0.0454545	0.00124763	122	0.00759571	TRUE	K14290 exportin-1
Bou_96110	9	11	27	12	0.333333	0.916667	-0.583333	0.0454545	0.00124763	84	0.00759571	TRUE	CSC1-like protein
Bou_35639	9	11	27	12	0.333333	0.916667	-0.583333	0.0454545	0.00124763	61	0.00759571	TRUE	K17675 ATP-dependent RNA helicase SUPV3L1/SUV3
Bou_59014	9	11	27	12	0.333333	0.916667	-0.583333	0.0454545	0.00124763	59	0.00759571	TRUE	Belongs to the EPSP synthase family
Bou_123175	9	11	27	12	0.333333	0.916667	-0.583333	0.0454545	0.00124763	33	0.00759571	TRUE	K11364 SAGA-associated factor 29
Bou_88572	7	10	27	12	0.259259	0.833333	-0.574074	0.07	0.00138529	59	0.00759571	TRUE	Belongs to the short-chain dehydrogenases reductases (SDR) family
Bou_95327	7	10	27	12	0.259259	0.833333	-0.574074	0.07	0.00138529	92	0.00759571	TRUE	K12891 splicing factor, arginine/serine-rich 2
Bou_108582	7	10	27	12	0.259259	0.833333	-0.574074	0.07	0.00138529	20	0.00759571	TRUE	Oxysterol-binding protein-related protein
Bou_8780	7	10	27	12	0.259259	0.833333	-0.574074	0.07	0.00138529	41	0.00759571	TRUE	Photosystem II reaction center W protein
Bou_109580	7	10	27	12	0.259259	0.833333	-0.574074	0.07	0.00138529	114	0.00759571	TRUE	Belongs to the Frigida family
Bou_62563	7	10	27	12	0.259259	0.833333	-0.574074	0.07	0.00138529	80	0.00759571	TRUE	Protein FAR1-RELATED SEQUENCE
Bou_88263	7	10	27	12	0.259259	0.833333	-0.574074	0.07	0.00138529	90	0.00759571	TRUE	K15893 hydroxypyruvate reductase 1
Bou_38381	7	10	27	12	0.259259	0.833333	-0.574074	0.07	0.00138529	64	0.00759571	TRUE	K20798 small RNA 2'-O-methyltransferase
Bou_27676	7	10	27	12	0.259259	0.833333	-0.574074	0.07	0.00138529	48	0.00759571	TRUE	Mitogen-activated protein kinase kinase kinase
Bou_131064	5	9	27	12	0.185185	0.75	-0.564815	0.0757576	0.00125654	54	0.00759571	TRUE	K11673 actin-related protein 8
Bou_8739	5	9	27	12	0.185185	0.75	-0.564815	0.0757576	0.00125654	16	0.00759571	TRUE	#N/A
Bou_3060	5	9	27	12	0.185185	0.75	-0.564815	0.0757576	0.00125654	25	0.00759571	TRUE	#N/A
Bou_63783	5	9	27	12	0.185185	0.75	-0.564815	0.0757576	0.00125654	20	0.00759571	TRUE	-
Bou_133565	5	9	27	12	0.185185	0.75	-0.564815	0.0757576	0.00125654	100	0.00759571	TRUE	K07936 GTP-binding nuclear protein Ran
Bou_46209	5	9	27	12	0.185185	0.75	-0.564815	0.0757576	0.00125654	47	0.00759571	TRUE	K03237 translation initiation factor 2 subunit 1
Bou_146962	5	9	27	12	0.185185	0.75	-0.564815	0.0757576	0.00125654	36	0.00759571	TRUE	K10956 protein transport protein SEC61 subunit alpha
Bou_56288	5	9	27	12	0.185185	0.75	-0.564815	0.0757576	0.00125654	77	0.00759571	TRUE	K10393 kinesin family member 2/24
Bou_61334	5	9	27	12	0.185185	0.75	-0.564815	0.0757576	0.00125654	59	0.00759571	TRUE	K14321 nucleoporin-like protein 2
Bou_107556	5	9	27	12	0.185185	0.75	-0.564815	0.0757576	0.00125654	39	0.00759571	TRUE	#N/A
Bou_150754	5	9	27	12	0.185185	0.75	-0.564815	0.0757576	0.00125654	53	0.00759571	TRUE	RING-type E3 ubiquitin transferase
Bou_145876	5	9	27	12	0.185185	0.75	-0.564815	0.0757576	0.00125654	83	0.00759571	TRUE	#N/A
Bou_8391	5	9	27	12	0.185185	0.75	-0.564815	0.0757576	0.00125654	28	0.00759571	TRUE	#N/A
Bou_10628	5	9	27	12	0.185185	0.75	-0.564815	0.0757576	0.00125654	57	0.00759571	TRUE	#N/A
Bou_119671	5	9	27	12	0.185185	0.75	-0.564815	0.0757576	0.00125654	38	0.00759571	TRUE	NHL repeat-containing protein
Bou_112625	5	9	27	12	0.185185	0.75	-0.564815	0.0757576	0.00125654	53	0.00759571	TRUE	K01640 hydroxymethylglutaryl-CoA lyase
Bou_65648	5	9	27	12	0.185185	0.75	-0.564815	0.0757576	0.00125654	62	0.00759571	TRUE	#N/A
Bou_102872	5	9	27	12	0.185185	0.75	-0.564815	0.0757576	0.00125654	70	0.00759571	TRUE	K20456 oxysterol-binding protein 1
Bou_65790	5	9	27	12	0.185185	0.75	-0.564815	0.0757576	0.00125654	23	0.00759571	TRUE	K11434 type I protein arginine methyltransferase
Bou_112844	5	9	27	12	0.185185	0.75	-0.564815	0.0757576	0.00125654	14	0.00759571	TRUE	peptidylprolyl
Bou_28972	5	9	27	12	0.185185	0.75	-0.564815	0.0757576	0.00125654	24	0.00759571	TRUE	Belongs to the complex I LYR family
Bou_36039	5	9	27	12	0.185185	0.75	-0.564815	0.0757576	0.00125654	74	0.00759571	TRUE	K09489 heat shock 70kDa protein 4
Bou_65498	5	9	27	12	0.185185	0.75	-0.564815	0.0757576	0.00125654	63	0.00759571	TRUE	K09533 DnaJ homolog subfamily C member 13
Bou_116783	5	9	27	12	0.185185	0.75	-0.564815	0.0757576	0.00125654	36	0.00759571	TRUE	K20855 beta-1,3-galactosyltransferase 1/2/3/4/5/7/8
Bou_20816	5	9	27	12	0.185185	0.75	-0.564815	0.0757576	0.00125654	59	0.00759571	TRUE	K03248 translation initiation factor 3 subunit G
Bou_65492	5	9	27	12	0.185185	0.75	-0.564815	0.0757576	0.00125654	26	0.00759571	TRUE	Filament-like plant protein
Bou_5904	5	9	27	12	0.185185	0.75	-0.564815	0.0757576	0.00125654	41	0.00759571	TRUE	K00232 acyl-CoA oxidase
Bou_65984	5	9	27	12	0.185185	0.75	-0.564815	0.0757576	0.00125654	19	0.00759571	TRUE	prolyl-tRNA synthetase associated domain-containing protein
Bou_126899	3	8	27	12	0.111111	0.666667	-0.555556	0.0625	0.000911001	70	0.0073312	TRUE	K06100 symplekin
Bou_21410	3	8	27	12	0.111111	0.666667	-0.555556	0.0625	0.000911001	11	0.0073312	TRUE	K13429 chitin elicitor receptor kinase 1
Bou_43651	3	8	27	12	0.111111	0.666667	-0.555556	0.0625	0.000911001	25	0.0073312	TRUE	#N/A
Bou_124606	3	8	27	12	0.111111	0.666667	-0.555556	0.0625	0.000911001	27	0.0073312	TRUE	Protein of unknown function (DUF632)
Bou_95835	3	8	27	12	0.111111	0.666667	-0.555556	0.0625	0.000911001	19	0.0073312	TRUE	calmodulin-binding transcription activator
Bou_69672	3	8	27	12	0.111111	0.666667	-0.555556	0.0625	0.000911001	28	0.0073312	TRUE	FAD NAD(P)-binding oxidoreductase family protein
Bou_107777	3	8	27	12	0.111111	0.666667	-0.555556	0.0625	0.000911001	58	0.0073312	TRUE	acetyltransferase At3g50280-like
Bou_131248	3	8	27	12	0.111111	0.666667	-0.555556	0.0625	0.000911001	66	0.0073312	TRUE	-
Bou_122154	3	8	27	12	0.111111	0.666667	-0.555556	0.0625	0.000911001	52	0.0073312	TRUE	K14486 auxin response factor
Bou_81501	3	8	27	12	0.111111	0.666667	-0.555556	0.0625	0.000911001	44	0.0073312	TRUE	chromatin remodeling
Bou_27070.1	3	8	27	12	0.111111	0.666667	-0.555556	0.0625	0.000911001	27	0.0073312	TRUE	K12867 pre-mRNA-splicing factor SYF1
Bou_58261	1	7	27	12	0.037037	0.583333	-0.546296	0.0274725	0.000355619	24	0.00349442	TRUE	K06670 cohesin complex subunit SCC1
Bou_65736	1	7	27	12	0.037037	0.583333	-0.546296	0.0274725	0.000355619	48	0.00349442	TRUE	K02218 casein kinase 1
Bou_145961	1	7	27	12	0.037037	0.583333	-0.546296	0.0274725	0.000355619	16	0.00349442	TRUE	WVD2-like 1
Bou_36631	1	7	27	12	0.037037	0.583333	-0.546296	0.0274725	0.000355619	61	0.00349442	TRUE	K00145 N-acetyl-gamma-glutamyl-phosphate reductase
Bou_68059	1	7	27	12	0.037037	0.583333	-0.546296	0.0274725	0.000355619	52	0.00349442	TRUE	Domain of unknown function (DUF4091)
Bou_141154	1	7	27	12	0.037037	0.583333	-0.546296	0.0274725	0.000355619	9	0.00349442	TRUE	Polypyrimidine tract-binding protein homolog
Bou_48788	1	7	27	12	0.037037	0.583333	-0.546296	0.0274725	0.000355619	30	0.00349442	TRUE	#N/A
Bou_39819	1	7	27	12	0.037037	0.583333	-0.546296	0.0274725	0.000355619	21	0.00349442	TRUE	-
Bou_51234	1	7	27	12	0.037037	0.583333	-0.546296	0.0274725	0.000355619	48	0.00349442	TRUE	#N/A
Bou_94966	1	7	27	12	0.037037	0.583333	-0.546296	0.0274725	0.000355619	9	0.00349442	TRUE	isoform X1
Bou_115658	1	7	27	12	0.037037	0.583333	-0.546296	0.0274725	0.000355619	15	0.00349442	TRUE	K14491 two-component response regulator ARR-B family
Bou_91123	1	7	27	12	0.037037	0.583333	-0.546296	0.0274725	0.000355619	30	0.00349442	TRUE	Probably inactive receptor-like protein kinase
Bou_100263	1	7	27	12	0.037037	0.583333	-0.546296	0.0274725	0.000355619	19	0.00349442	TRUE	#N/A
Bou_101400	1	7	27	12	0.037037	0.583333	-0.546296	0.0274725	0.000355619	16	0.00349442	TRUE	K15190 7SK snRNA methylphosphate capping enzyme
Bou_97541	1	7	27	12	0.037037	0.583333	-0.546296	0.0274725	0.000355619	30	0.00349442	TRUE	Acyclic terpene utilisation family protein AtuA
Bou_116969	1	7	27	12	0.037037	0.583333	-0.546296	0.0274725	0.000355619	17	0.00349442	TRUE	zinc finger CCCH domain-containing protein
Bou_75756	1	7	27	12	0.037037	0.583333	-0.546296	0.0274725	0.000355619	33	0.00349442	TRUE	#N/A
Bou_86923	1	7	27	12	0.037037	0.583333	-0.546296	0.0274725	0.000355619	33	0.00349442	TRUE	#N/A
Bou_54280	1	7	27	12	0.037037	0.583333	-0.546296	0.0274725	0.000355619	42	0.00349442	TRUE	#N/A
Bou_78483	1	7	27	12	0.037037	0.583333	-0.546296	0.0274725	0.000355619	60	0.00349442	TRUE	K14570 RNA exonuclease 1
Bou_104340	1	7	27	12	0.037037	0.583333	-0.546296	0.0274725	0.000355619	85	0.00349442	TRUE	Protein root UVB sensitive 2
Bou_28529	1	7	27	12	0.037037	0.583333	-0.546296	0.0274725	0.000355619	60	0.00349442	TRUE	Its function is described as protein serine threonine kinase activity, protein kinase activity, kinase activity, ATP binding
Bou_63709	1	7	27	12	0.037037	0.583333	-0.546296	0.0274725	0.000355619	23	0.00349442	TRUE	UPF0392 protein
Bou_101325	10	11	27	12	0.37037	0.916667	-0.546296	0.0534759	0.00187422	54	0.00967957	TRUE	K16279 E3 ubiquitin-protein ligase KEG
Bou_86843	10	11	27	12	0.37037	0.916667	-0.546296	0.0534759	0.00187422	116	0.00967957	TRUE	K00434 L-ascorbate peroxidase
Bou_140764	10	11	27	12	0.37037	0.916667	-0.546296	0.0534759	0.00187422	42	0.00967957	TRUE	Type I inositol 1,4,5-trisphosphate 5-phosphatase
Bou_17984	10	11	27	12	0.37037	0.916667	-0.546296	0.0534759	0.00187422	86	0.00967957	TRUE	K18667 activating signal cointegrator complex subunit 2
Bou_11990	10	11	27	12	0.37037	0.916667	-0.546296	0.0534759	0.00187422	66	0.00967957	TRUE	K11000 callose synthase
Bou_51570	10	11	27	12	0.37037	0.916667	-0.546296	0.0534759	0.00187422	165	0.00967957	TRUE	Sterol 3-beta-glucosyltransferase
Bou_99900	10	11	27	12	0.37037	0.916667	-0.546296	0.0534759	0.00187422	78	0.00967957	TRUE	K20027 palmitoyltransferase ZDHHC1/11
Bou_42856	10	11	27	12	0.37037	0.916667	-0.546296	0.0534759	0.00187422	51	0.00967957	TRUE	K10807 ribonucleoside-diphosphate reductase subunit M1
Bou_97760	10	11	27	12	0.37037	0.916667	-0.546296	0.0534759	0.00187422	86	0.00967957	TRUE	K01512 acylphosphatase
Bou_46008	10	11	27	12	0.37037	0.916667	-0.546296	0.0534759	0.00187422	79	0.00967957	TRUE	Serine threonine-protein kinase
Bou_98398	10	11	27	12	0.37037	0.916667	-0.546296	0.0534759	0.00187422	119	0.00967957	TRUE	K03020 DNA-directed RNA polymerases I and III subunit RPAC2
Bou_100465	2	7	27	12	0.0740741	0.583333	-0.509259	0.0571429	0.00137591	29	0.00759571	TRUE	K03032 26S proteasome regulatory subunit N2
Bou_113984	2	7	27	12	0.0740741	0.583333	-0.509259	0.0571429	0.00137591	27	0.00759571	TRUE	pyrophosphate-energized membrane proton pump
Bou_6057	2	7	27	12	0.0740741	0.583333	-0.509259	0.0571429	0.00137591	40	0.00759571	TRUE	#N/A
Bou_110869	2	7	27	12	0.0740741	0.583333	-0.509259	0.0571429	0.00137591	28	0.00759571	TRUE	K08901 photosystem II oxygen-evolving enhancer protein 3
Bou_100739	2	7	27	12	0.0740741	0.583333	-0.509259	0.0571429	0.00137591	26	0.00759571	TRUE	#N/A
Bou_118310	2	7	27	12	0.0740741	0.583333	-0.509259	0.0571429	0.00137591	22	0.00759571	TRUE	K10801 methyl-CpG-binding domain protein 4
Bou_77074	2	7	27	12	0.0740741	0.583333	-0.509259	0.0571429	0.00137591	21	0.00759571	TRUE	K10563 formamidopyrimidine-DNA glycosylase
Bou_101511	2	7	27	12	0.0740741	0.583333	-0.509259	0.0571429	0.00137591	26	0.00759571	TRUE	K05853 Ca2+ transporting ATPase, sarcoplasmic/endoplasmic reticulum
Bou_109329	2	7	27	12	0.0740741	0.583333	-0.509259	0.0571429	0.00137591	21	0.00759571	TRUE	N-terminal region of Chorein or VPS13
Bou_108446	2	7	27	12	0.0740741	0.583333	-0.509259	0.0571429	0.00137591	13	0.00759571	TRUE	#N/A
Bou_79749	2	7	27	12	0.0740741	0.583333	-0.509259	0.0571429	0.00137591	36	0.00759571	TRUE	K01609 indole-3-glycerol phosphate synthase
Bou_130305	2	7	27	12	0.0740741	0.583333	-0.509259	0.0571429	0.00137591	13	0.00759571	TRUE	K14493 gibberellin receptor GID1
Bou_122564	2	7	27	12	0.0740741	0.583333	-0.509259	0.0571429	0.00137591	29	0.00759571	TRUE	K12180 COP9 signalosome complex subunit 7
Bou_111152	2	7	27	12	0.0740741	0.583333	-0.509259	0.0571429	0.00137591	37	0.00759571	TRUE	Glyoxysomal processing protease
Bou_74870	2	7	27	12	0.0740741	0.583333	-0.509259	0.0571429	0.00137591	27	0.00759571	TRUE	K14424 4-alpha-methyl-delta7-sterol-4alpha-methyl oxidase
Bou_134588	0	6	27	12	0	0.5	-0.5	0	0.000283208	22	0.0029705	TRUE	K00326 cytochrome-b5 reductase
Bou_3146	0	6	27	12	0	0.5	-0.5	0	0.000283208	12	0.0029705	TRUE	K01476 arginase
Bou_33764	0	6	27	12	0	0.5	-0.5	0	0.000283208	25	0.0029705	TRUE	#N/A
Bou_38099	0	6	27	12	0	0.5	-0.5	0	0.000283208	8	0.0029705	TRUE	K00869 mevalonate kinase
Bou_22767	0	6	27	12	0	0.5	-0.5	0	0.000283208	21	0.0029705	TRUE	K08819 cyclin-dependent kinase 12/13
Bou_44582	0	6	27	12	0	0.5	-0.5	0	0.000283208	19	0.0029705	TRUE	K07441 beta-1,4-N-acetylglucosaminyltransferase
Bou_69064	0	6	27	12	0	0.5	-0.5	0	0.000283208	12	0.0029705	TRUE	K08269 serine/threonine-protein kinase ULK/ATG1
Bou_149637	0	6	27	12	0	0.5	-0.5	0	0.000283208	21	0.0029705	TRUE	C2 domain-containing protein
Bou_74644	0	6	27	12	0	0.5	-0.5	0	0.000283208	12	0.0029705	TRUE	K11155 diacylglycerol O-acyltransferase 1
Bou_110566	0	6	27	12	0	0.5	-0.5	0	0.000283208	28	0.0029705	TRUE	ER membrane protein complex subunit
Bou_103455	0	6	27	12	0	0.5	-0.5	0	0.000283208	19	0.0029705	TRUE	K12837 splicing factor U2AF 65 kDa subunit
Bou_24562	0	6	27	12	0	0.5	-0.5	0	0.000283208	9	0.0029705	TRUE	#N/A
Bou_4675	0	6	27	12	0	0.5	-0.5	0	0.000283208	19	0.0029705	TRUE	#N/A
Bou_40076	0	6	27	12	0	0.5	-0.5	0	0.000283208	12	0.0029705	TRUE	K00326 cytochrome-b5 reductase
Bou_120368	0	6	27	12	0	0.5	-0.5	0	0.000283208	14	0.0029705	TRUE	Large proline-rich protein
Bou_65474	0	6	27	12	0	0.5	-0.5	0	0.000283208	16	0.0029705	TRUE	K03787 5'-nucleotidase
Bou_94685	0	6	27	12	0	0.5	-0.5	0	0.000283208	10	0.0029705	TRUE	K13141 integrator complex subunit 4
Bou_145119	0	6	27	12	0	0.5	-0.5	0	0.000283208	18	0.0029705	TRUE	belongs to the protein kinase superfamily
Bou_95821.1	0	6	27	12	0	0.5	-0.5	0	0.000283208	22	0.0029705	TRUE	#N/A
Bou_121124	0	6	27	12	0	0.5	-0.5	0	0.000283208	15	0.0029705	TRUE	L-type lectin-domain containing receptor kinase
Bou_33578	0	6	27	12	0	0.5	-0.5	0	0.000283208	6	0.0029705	TRUE	#N/A
Bou_12372.2	0	6	27	12	0	0.5	-0.5	0	0.000283208	10	0.0029705	TRUE	#N/A
Bou_24804	0	6	27	12	0	0.5	-0.5	0	0.000283208	60	0.0029705	TRUE	K10999 cellulose synthase A
Bou_147432	0	6	27	12	0	0.5	-0.5	0	0.000283208	19	0.0029705	TRUE	K12666 oligosaccharyltransferase complex subunit alpha (ribophorin I)
Bou_122507	0	6	27	12	0	0.5	-0.5	0	0.000283208	22	0.0029705	TRUE	K02183 calmodulin
Bou_98935	0	6	27	12	0	0.5	-0.5	0	0.000283208	15	0.0029705	TRUE	Pentatricopeptide repeat-containing protein
Bou_47731	0	6	27	12	0	0.5	-0.5	0	0.000283208	6	0.0029705	TRUE	#N/A
Bou_73596	0	6	27	12	0	0.5	-0.5	0	0.000283208	8	0.0029705	TRUE	K10691 E3 ubiquitin-protein ligase UBR4
Bou_122792	0	6	27	12	0	0.5	-0.5	0	0.000283208	32	0.0029705	TRUE	K01392 thimet oligopeptidase
Bou_131759	0	6	27	12	0	0.5	-0.5	0	0.000283208	11	0.0029705	TRUE	#N/A
Bou_26142	0	6	27	12	0	0.5	-0.5	0	0.000283208	19	0.0029705	TRUE	K15178 RNA polymerase-associated protein RTF1
Bou_94781	0	6	27	12	0	0.5	-0.5	0	0.000283208	17	0.0029705	TRUE	K12608 CCR4-NOT complex subunit CAF16
Bou_119909	0	6	27	12	0	0.5	-0.5	0	0.000283208	15	0.0029705	TRUE	ultraviolet-B receptor
Bou_73278	0	6	27	12	0	0.5	-0.5	0	0.000283208	22	0.0029705	TRUE	K03696 ATP-dependent Clp protease ATP-binding subunit ClpC
Bou_78374	0	6	27	12	0	0.5	-0.5	0	0.000283208	23	0.0029705	TRUE	#N/A
Bou_10879	0	6	27	12	0	0.5	-0.5	0	0.000283208	42	0.0029705	TRUE	#N/A
Bou_60955	0	6	27	12	0	0.5	-0.5	0	0.000283208	22	0.0029705	TRUE	#N/A
Bou_92991	0	6	27	12	0	0.5	-0.5	0	0.000283208	19	0.0029705	TRUE	K13175 THO complex subunit 6
Bou_20298.2	0	6	27	12	0	0.5	-0.5	0	0.000283208	11	0.0029705	TRUE	mediator of RNA polymerase II transcription subunit
Bou_101118	0	6	27	12	0	0.5	-0.5	0	0.000283208	34	0.0029705	TRUE	#N/A
Bou_141296	0	6	27	12	0	0.5	-0.5	0	0.000283208	6	0.0029705	TRUE	K14301 nuclear pore complex protein Nup107
Bou_24243	0	6	27	12	0	0.5	-0.5	0	0.000283208	19	0.0029705	TRUE	Pentatricopeptide repeat-containing protein
Bou_36189	0	6	27	12	0	0.5	-0.5	0	0.000283208	31	0.0029705	TRUE	Glycosyltransferase-like
Bou_53238	0	6	27	12	0	0.5	-0.5	0	0.000283208	16	0.0029705	TRUE	#N/A
Bou_8260	0	6	27	12	0	0.5	-0.5	0	0.000283208	6	0.0029705	TRUE	#N/A
Bou_13243	0	6	27	12	0	0.5	-0.5	0	0.000283208	31	0.0029705	TRUE	#N/A
Bou_118912	0	6	27	12	0	0.5	-0.5	0	0.000283208	17	0.0029705	TRUE	K01889 phenylalanyl-tRNA synthetase alpha chain
Bou_20119	0	6	27	12	0	0.5	-0.5	0	0.000283208	24	0.0029705	TRUE	inactive purple acid phosphatase
Bou_94001	0	6	27	12	0	0.5	-0.5	0	0.000283208	12	0.0029705	TRUE	#N/A
Bou_107311	0	6	27	12	0	0.5	-0.5	0	0.000283208	12	0.0029705	TRUE	K07007 uncharacterized protein
Bou_53200	0	6	27	12	0	0.5	-0.5	0	0.000283208	9	0.0029705	TRUE	#N/A
Bou_143707	0	6	27	12	0	0.5	-0.5	0	0.000283208	8	0.0029705	TRUE	RNA-binding protein with multiple splicing
Bou_95136	0	6	27	12	0	0.5	-0.5	0	0.000283208	12	0.0029705	TRUE	Coiled-coil regions of plant-specific actin-binding protein
Bou_141933	0	6	27	12	0	0.5	-0.5	0	0.000283208	32	0.0029705	TRUE	Pentatricopeptide repeat-containing protein
Bou_7618	0	6	27	12	0	0.5	-0.5	0	0.000283208	13	0.0029705	TRUE	#N/A
Bou_90908	0	6	27	12	0	0.5	-0.5	0	0.000283208	14	0.0029705	TRUE	RING-type E3 ubiquitin transferase
Bou_144454	0	6	27	12	0	0.5	-0.5	0	0.000283208	17	0.0029705	TRUE	K15920 beta-D-xylosidase 4
Bou_136252	0	6	27	12	0	0.5	-0.5	0	0.000283208	50	0.0029705	TRUE	Pentatricopeptide repeat-containing protein
Bou_18864	0	6	27	12	0	0.5	-0.5	0	0.000283208	9	0.0029705	TRUE	#N/A
Bou_7805	0	6	27	12	0	0.5	-0.5	0	0.000283208	21	0.0029705	TRUE	K01714 4-hydroxy-tetrahydrodipicolinate synthase
Bou_104976	0	6	27	12	0	0.5	-0.5	0	0.000283208	49	0.0029705	TRUE	K14664 IAA-amino acid hydrolase
Bou_17967	0	6	27	12	0	0.5	-0.5	0	0.000283208	6	0.0029705	TRUE	#N/A
Bou_47196	0	6	27	12	0	0.5	-0.5	0	0.000283208	18	0.0029705	TRUE	K05236 coatomer subunit alpha
Bou_81802	0	6	27	12	0	0.5	-0.5	0	0.000283208	18	0.0029705	TRUE	zinc finger CCCH domain-containing protein
Bou_11202	0	6	27	12	0	0.5	-0.5	0	0.000283208	8	0.0029705	TRUE	Belongs to the peroxidase family. Classical plant (class III) peroxidase subfamily
Bou_129716	0	6	27	12	0	0.5	-0.5	0	0.000283208	16	0.0029705	TRUE	K17506 protein phosphatase 1L
Bou_14047	0	6	27	12	0	0.5	-0.5	0	0.000283208	9	0.0029705	TRUE	#N/A
Bou_120353	0	6	27	12	0	0.5	-0.5	0	0.000283208	8	0.0029705	TRUE	K10046 GDP-D-mannose 3', 5'-epimerase
Bou_26	0	6	27	12	0	0.5	-0.5	0	0.000283208	8	0.0029705	TRUE	#N/A
Bou_73016	0	6	27	12	0	0.5	-0.5	0	0.000283208	11	0.0029705	TRUE	#N/A
Bou_77112	0	6	27	12	0	0.5	-0.5	0	0.000283208	25	0.0029705	TRUE	K12133 MYB-related transcription factor LHY
Bou_28831	0	6	27	12	0	0.5	-0.5	0	0.000283208	58	0.0029705	TRUE	Contains the following InterPro domains Protein kinase, catalytic domain (InterPro IPR000719), Serine-threonine tyrosine-protein kinase (InterPro IPR001245), Serine threonine protein kinase-like, ATMRK (InterPro IPR015783), Protein kinase-like domain (InterPro IPR011009), Serine threonine-protein kinase, active site (InterPro IPR008271)
Bou_10341	0	6	27	12	0	0.5	-0.5	0	0.000283208	6	0.0029705	TRUE	#N/A
Bou_31583	0	6	27	12	0	0.5	-0.5	0	0.000283208	11	0.0029705	TRUE	K10752 histone-binding protein RBBP4
Bou_29612	0	6	27	12	0	0.5	-0.5	0	0.000283208	16	0.0029705	TRUE	K13946 auxin influx carrier (AUX1 LAX family)
Bou_46423	0	6	27	12	0	0.5	-0.5	0	0.000283208	18	0.0029705	TRUE	Aminoacyl-tRNA editing domain
Bou_15036	0	6	27	12	0	0.5	-0.5	0	0.000283208	14	0.0029705	TRUE	#N/A
Bou_146766	0	6	27	12	0	0.5	-0.5	0	0.000283208	14	0.0029705	TRUE	Dual specificity protein kinase
Bou_106368	0	6	27	12	0	0.5	-0.5	0	0.000283208	29	0.0029705	TRUE	K01613 phosphatidylserine decarboxylase
Bou_97322	0	6	27	12	0	0.5	-0.5	0	0.000283208	20	0.0029705	TRUE	K11339 mortality factor 4-like protein 1
Bou_108580	0	6	27	12	0	0.5	-0.5	0	0.000283208	32	0.0029705	TRUE	K11430 histone-lysine N-methyltransferase EZH2
Bou_96966	0	6	27	12	0	0.5	-0.5	0	0.000283208	67	0.0029705	TRUE	K05864 peptidyl-prolyl isomerase D
Bou_127621	0	6	27	12	0	0.5	-0.5	0	0.000283208	8	0.0029705	TRUE	#N/A
Bou_29674	0	6	27	12	0	0.5	-0.5	0	0.000283208	71	0.0029705	TRUE	K15501 serine/threonine-protein phosphatase 6 regulatory subunit 3
Bou_22247	0	6	27	12	0	0.5	-0.5	0	0.000283208	12	0.0029705	TRUE	K02154 V-type H+-transporting ATPase subunit a
Bou_107829	0	6	27	12	0	0.5	-0.5	0	0.000283208	23	0.0029705	TRUE	K00592 [ribulose-bisphosphate carboxylase]-lysine N-methyltransferase
Bou_132287	0	6	27	12	0	0.5	-0.5	0	0.000283208	54	0.0029705	TRUE	Major facilitator superfamily
Bou_65274	0	6	27	12	0	0.5	-0.5	0	0.000283208	6	0.0029705	TRUE	BEST Arabidopsis thaliana protein match is Ubiquitin carboxyl-terminal hydrolase-related protein (TAIR
Bou_89168	0	6	27	12	0	0.5	-0.5	0	0.000283208	19	0.0029705	TRUE	CSC1-like protein
Bou_97668	0	6	27	12	0	0.5	-0.5	0	0.000283208	9	0.0029705	TRUE	K14289 exportin-5
Bou_111166	0	6	27	12	0	0.5	-0.5	0	0.000283208	14	0.0029705	TRUE	K03115 casein kinase II subunit beta
Bou_42941	0	6	27	12	0	0.5	-0.5	0	0.000283208	8	0.0029705	TRUE	#N/A
Bou_17364	0	6	27	12	0	0.5	-0.5	0	0.000283208	22	0.0029705	TRUE	K11799 WD repeat-containing protein 21A
Bou_61259	0	6	27	12	0	0.5	-0.5	0	0.000283208	21	0.0029705	TRUE	K04079 molecular chaperone HtpG
Bou_59010	0	6	27	12	0	0.5	-0.5	0	0.000283208	13	0.0029705	TRUE	calmodulin-binding transcription activator
Bou_59360	1	6	27	12	0.037037	0.5	-0.462963	0.0384615	0.0016735	9	0.00878882	TRUE	Hydroxyproline-rich glycoprotein family protein
Bou_115313	1	6	27	12	0.037037	0.5	-0.462963	0.0384615	0.0016735	10	0.00878882	TRUE	K14552 NET1-associated nuclear protein 1 (U3 small nucleolar RNA-associated protein 17)
Bou_96779	1	6	27	12	0.037037	0.5	-0.462963	0.0384615	0.0016735	28	0.00878882	TRUE	K18342 OTU domain-containing protein 6
Bou_52053	1	6	27	12	0.037037	0.5	-0.462963	0.0384615	0.0016735	28	0.00878882	TRUE	Domain of unknown function (DUF4598)
Bou_21905	1	6	27	12	0.037037	0.5	-0.462963	0.0384615	0.0016735	13	0.00878882	TRUE	RING FYVE PHD zinc finger superfamily protein
Bou_132576	1	6	27	12	0.037037	0.5	-0.462963	0.0384615	0.0016735	21	0.00878882	TRUE	K05293 phosphatidylinositol glycan, class U
Bou_45361	1	6	27	12	0.037037	0.5	-0.462963	0.0384615	0.0016735	19	0.00878882	TRUE	-
Bou_52828	1	6	27	12	0.037037	0.5	-0.462963	0.0384615	0.0016735	15	0.00878882	TRUE	K01897 long-chain acyl-CoA synthetase
Bou_38970	1	6	27	12	0.037037	0.5	-0.462963	0.0384615	0.0016735	19	0.00878882	TRUE	K13179 ATP-dependent RNA helicase DDX18/HAS1
Bou_117361	1	6	27	12	0.037037	0.5	-0.462963	0.0384615	0.0016735	7	0.00878882	TRUE	#N/A
Bou_60990	1	6	27	12	0.037037	0.5	-0.462963	0.0384615	0.0016735	18	0.00878882	TRUE	K01530 phospholipid-translocating ATPase
Bou_91062	1	6	27	12	0.037037	0.5	-0.462963	0.0384615	0.0016735	8	0.00878882	TRUE	acetyltransferase At3g50280-like
Bou_14602	1	6	27	12	0.037037	0.5	-0.462963	0.0384615	0.0016735	8	0.00878882	TRUE	#N/A
Bou_120938	1	6	27	12	0.037037	0.5	-0.462963	0.0384615	0.0016735	9	0.00878882	TRUE	K01530 phospholipid-translocating ATPase
Bou_65214	1	6	27	12	0.037037	0.5	-0.462963	0.0384615	0.0016735	30	0.00878882	TRUE	K00991 2-C-methyl-D-erythritol 4-phosphate cytidylyltransferase
Bou_129182	1	6	27	12	0.037037	0.5	-0.462963	0.0384615	0.0016735	16	0.00878882	TRUE	Protein ZINC INDUCED
Bou_20204	1	6	27	12	0.037037	0.5	-0.462963	0.0384615	0.0016735	29	0.00878882	TRUE	#N/A
Bou_21147	1	6	27	12	0.037037	0.5	-0.462963	0.0384615	0.0016735	24	0.00878882	TRUE	Receptor-like serine threonine-protein kinase ALE2
Bou_30289	1	6	27	12	0.037037	0.5	-0.462963	0.0384615	0.0016735	31	0.00878882	TRUE	TPR repeat-containing thioredoxin
Bou_113174	1	6	27	12	0.037037	0.5	-0.462963	0.0384615	0.0016735	18	0.00878882	TRUE	K14759 isochorismate synthase / 2-succinyl-5-enolpyruvyl-6-hydroxy-3-cyclohexene-1-carboxylate synthase / 2-succinyl-6-hydroxy-2,4-cyclohexadiene-1-carboxylate synthase / O-succinylbenzoate synthase
Bou_87158	1	6	27	12	0.037037	0.5	-0.462963	0.0384615	0.0016735	31	0.00878882	TRUE	K17491 protein phosphatase 4 regulatory subunit 3
Bou_61762	1	6	27	12	0.037037	0.5	-0.462963	0.0384615	0.0016735	24	0.00878882	TRUE	Belongs to the NARF family
Bou_89541	1	6	27	12	0.037037	0.5	-0.462963	0.0384615	0.0016735	18	0.00878882	TRUE	K05391 cyclic nucleotide gated channel, other eukaryote
Bou_107333	1	6	27	12	0.037037	0.5	-0.462963	0.0384615	0.0016735	35	0.00878882	TRUE	K10143 E3 ubiquitin-protein ligase RFWD2
Bou_119514	0	5	27	12	0	0.416667	-0.416667	0	0.00137558	25	0.00759571	TRUE	K08057 calreticulin
Bou_81694	0	5	27	12	0	0.416667	-0.416667	0	0.00137558	5	0.00759571	TRUE	#N/A
Bou_23565	0	5	27	12	0	0.416667	-0.416667	0	0.00137558	6	0.00759571	TRUE	SEC14 cytosolic factor family protein phosphoglyceride transfer family protein
Bou_58999	0	5	27	12	0	0.416667	-0.416667	0	0.00137558	10	0.00759571	TRUE	#N/A
Bou_54722	0	5	27	12	0	0.416667	-0.416667	0	0.00137558	16	0.00759571	TRUE	Protein RMD5 homolog A-like
Bou_132299	0	5	27	12	0	0.416667	-0.416667	0	0.00137558	18	0.00759571	TRUE	K01778 diaminopimelate epimerase
Bou_117574	0	5	27	12	0	0.416667	-0.416667	0	0.00137558	15	0.00759571	TRUE	#N/A
Bou_111252	0	5	27	12	0	0.416667	-0.416667	0	0.00137558	8	0.00759571	TRUE	K09493 T-complex protein 1 subunit alpha
Bou_6576	0	5	27	12	0	0.416667	-0.416667	0	0.00137558	45	0.00759571	TRUE	K01736 chorismate synthase
Bou_81611	0	5	27	12	0	0.416667	-0.416667	0	0.00137558	22	0.00759571	TRUE	K09534 DnaJ homolog subfamily C member 14
Bou_18185	0	5	27	12	0	0.416667	-0.416667	0	0.00137558	9	0.00759571	TRUE	K16750 biogenesis of lysosome-related organelles complex 1 subunit 2
Bou_74584	0	5	27	12	0	0.416667	-0.416667	0	0.00137558	21	0.00759571	TRUE	Polycomb group protein EMBRYONIC FLOWER
Bou_39973	0	5	27	12	0	0.416667	-0.416667	0	0.00137558	8	0.00759571	TRUE	K14792 rRNA biogenesis protein RRP5
Bou_28299	0	5	27	12	0	0.416667	-0.416667	0	0.00137558	24	0.00759571	TRUE	#N/A
Bou_106411	0	5	27	12	0	0.416667	-0.416667	0	0.00137558	5	0.00759571	TRUE	K06627 cyclin A
Bou_106494	0	5	27	12	0	0.416667	-0.416667	0	0.00137558	39	0.00759571	TRUE	K08909 light-harvesting complex I chlorophyll a/b binding protein 3
Bou_67263	0	5	27	12	0	0.416667	-0.416667	0	0.00137558	5	0.00759571	TRUE	K11517 (S)-2-hydroxy-acid oxidase
Bou_39151	0	5	27	12	0	0.416667	-0.416667	0	0.00137558	12	0.00759571	TRUE	K01886 glutaminyl-tRNA synthetase
Bou_145088	0	5	27	12	0	0.416667	-0.416667	0	0.00137558	5	0.00759571	TRUE	Carboxyvinyl-carboxyphosphonate phosphorylmutase
Bou_25349	0	5	27	12	0	0.416667	-0.416667	0	0.00137558	7	0.00759571	TRUE	K01681 aconitate hydratase
Bou_29680	0	5	27	12	0	0.416667	-0.416667	0	0.00137558	8	0.00759571	TRUE	K08495 golgi SNAP receptor complex member 1
Bou_3989	0	5	27	12	0	0.416667	-0.416667	0	0.00137558	11	0.00759571	TRUE	#N/A
Bou_63634	0	5	27	12	0	0.416667	-0.416667	0	0.00137558	25	0.00759571	TRUE	K00850 6-phosphofructokinase 1
Bou_96783	0	5	27	12	0	0.416667	-0.416667	0	0.00137558	13	0.00759571	TRUE	K08331 autophagy-related protein 13
Bou_78166	0	5	27	12	0	0.416667	-0.416667	0	0.00137558	11	0.00759571	TRUE	Belongs to the peptidase A1 family
Bou_93616	0	5	27	12	0	0.416667	-0.416667	0	0.00137558	7	0.00759571	TRUE	K20523 SH3 domain-containing YSC84-like protein 1
Bou_1757	0	5	27	12	0	0.416667	-0.416667	0	0.00137558	13	0.00759571	TRUE	superfamily. Protein
Bou_60768	0	5	27	12	0	0.416667	-0.416667	0	0.00137558	29	0.00759571	TRUE	K14303 nuclear pore complex protein Nup160
Bou_79106	0	5	27	12	0	0.416667	-0.416667	0	0.00137558	25	0.00759571	TRUE	#N/A
Bou_144277	0	5	27	12	0	0.416667	-0.416667	0	0.00137558	9	0.00759571	TRUE	Tudor PWWP MBT superfamily protein
Bou_17105	0	5	27	12	0	0.416667	-0.416667	0	0.00137558	5	0.00759571	TRUE	diacylglycerol kinase family protein
Bou_119762	0	5	27	12	0	0.416667	-0.416667	0	0.00137558	6	0.00759571	TRUE	K14799 pre-rRNA-processing protein TSR1
Bou_34979	0	5	27	12	0	0.416667	-0.416667	0	0.00137558	18	0.00759571	TRUE	K10736 minichromosome maintenance protein 10
Bou_74629	0	5	27	12	0	0.416667	-0.416667	0	0.00137558	23	0.00759571	TRUE	methyltransferase PMT2
Bou_136904	0	5	27	12	0	0.416667	-0.416667	0	0.00137558	28	0.00759571	TRUE	3'-5' exonuclease domain-containing protein K homology domain-containing protein KH domain-containing protein
Bou_5582	0	5	27	12	0	0.416667	-0.416667	0	0.00137558	17	0.00759571	TRUE	#N/A
Bou_41673	0	5	27	12	0	0.416667	-0.416667	0	0.00137558	21	0.00759571	TRUE	#N/A
Bou_41724	0	5	27	12	0	0.416667	-0.416667	0	0.00137558	10	0.00759571	TRUE	#N/A
Bou_84754	0	5	27	12	0	0.416667	-0.416667	0	0.00137558	7	0.00759571	TRUE	K04733 interleukin-1 receptor-associated kinase 4
Bou_40932	0	5	27	12	0	0.416667	-0.416667	0	0.00137558	5	0.00759571	TRUE	sphingolipid transporter spinster homolog
Bou_79688	0	5	27	12	0	0.416667	-0.416667	0	0.00137558	10	0.00759571	TRUE	Heavy metal-associated isoprenylated plant protein
Bou_112984	0	5	27	12	0	0.416667	-0.416667	0	0.00137558	30	0.00759571	TRUE	K01179 endoglucanase
Bou_27255	0	5	27	12	0	0.416667	-0.416667	0	0.00137558	10	0.00759571	TRUE	-
Bou_35561	0	5	27	12	0	0.416667	-0.416667	0	0.00137558	6	0.00759571	TRUE	Belongs to the class V-like SAM-binding methyltransferase superfamily. Histone-lysine methyltransferase family. TRX MLL subfamily
Bou_132055	0	5	27	12	0	0.416667	-0.416667	0	0.00137558	15	0.00759571	TRUE	K14692 solute carrier family 30 (zinc transporter), member 5/7
Bou_45125	0	5	27	12	0	0.416667	-0.416667	0	0.00137558	10	0.00759571	TRUE	K20102 YTH domain-containing family protein
Bou_86025	0	5	27	12	0	0.416667	-0.416667	0	0.00137558	22	0.00759571	TRUE	K10290 F-box protein 3
Bou_64702	0	5	27	12	0	0.416667	-0.416667	0	0.00137558	23	0.00759571	TRUE	K10908 DNA-directed RNA polymerase, mitochondrial
Bou_27251	0	5	27	12	0	0.416667	-0.416667	0	0.00137558	10	0.00759571	TRUE	acid phosphatase
Bou_132125	0	5	27	12	0	0.416667	-0.416667	0	0.00137558	17	0.00759571	TRUE	K17613 calcineurin-binding protein cabin-1
Bou_112136	0	5	27	12	0	0.416667	-0.416667	0	0.00137558	30	0.00759571	TRUE	-
Bou_29560	0	5	27	12	0	0.416667	-0.416667	0	0.00137558	5	0.00759571	TRUE	Tetratricopeptide repeat protein
Bou_43362	0	5	27	12	0	0.416667	-0.416667	0	0.00137558	5	0.00759571	TRUE	K08775 breast cancer 2 susceptibility protein
Bou_98420	0	5	27	12	0	0.416667	-0.416667	0	0.00137558	32	0.00759571	TRUE	#N/A
Bou_63034	0	5	27	12	0	0.416667	-0.416667	0	0.00137558	5	0.00759571	TRUE	K17506 protein phosphatase 1L
Bou_64018	0	5	27	12	0	0.416667	-0.416667	0	0.00137558	5	0.00759571	TRUE	Auxilin-related protein
Bou_54613	0	5	27	12	0	0.416667	-0.416667	0	0.00137558	18	0.00759571	TRUE	K03504 DNA polymerase delta subunit 3
Bou_110864	0	5	27	12	0	0.416667	-0.416667	0	0.00137558	8	0.00759571	TRUE	K08597 sentrin-specific protease 8
Bou_42300	0	5	27	12	0	0.416667	-0.416667	0	0.00137558	5	0.00759571	TRUE	K14799 pre-rRNA-processing protein TSR1
Bou_18066	0	5	27	12	0	0.416667	-0.416667	0	0.00137558	15	0.00759571	TRUE	K16196 eukaryotic translation initiation factor 2-alpha kinase 4
Bou_134598	0	5	27	12	0	0.416667	-0.416667	0	0.00137558	6	0.00759571	TRUE	K11592 endoribonuclease Dicer
Bou_53961	0	5	27	12	0	0.416667	-0.416667	0	0.00137558	26	0.00759571	TRUE	serine threonine-protein kinase
Bou_29815	0	5	27	12	0	0.416667	-0.416667	0	0.00137558	11	0.00759571	TRUE	#N/A
Bou_74254	0	5	27	12	0	0.416667	-0.416667	0	0.00137558	30	0.00759571	TRUE	K17604 zinc finger SWIM domain-containing protein 3
Bou_51076	0	5	27	12	0	0.416667	-0.416667	0	0.00137558	8	0.00759571	TRUE	Casein Kinase
Bou_62598	0	5	27	12	0	0.416667	-0.416667	0	0.00137558	10	0.00759571	TRUE	Transcription initiation factor IIF subunit
Bou_145022	0	5	27	12	0	0.416667	-0.416667	0	0.00137558	6	0.00759571	TRUE	K03262 translation initiation factor 5
Bou_133638	0	5	27	12	0	0.416667	-0.416667	0	0.00137558	11	0.00759571	TRUE	K06889 uncharacterized protein
Bou_15284	0	5	27	12	0	0.416667	-0.416667	0	0.00137558	19	0.00759571	TRUE	K07052 uncharacterized protein
Bou_34261	0	5	27	12	0	0.416667	-0.416667	0	0.00137558	43	0.00759571	TRUE	K03364 cell division cycle 20-like protein 1, cofactor of APC complex
Bou_41927	0	5	27	12	0	0.416667	-0.416667	0	0.00137558	21	0.00759571	TRUE	K11339 mortality factor 4-like protein 1
Bou_105551	0	5	27	12	0	0.416667	-0.416667	0	0.00137558	25	0.00759571	TRUE	#N/A
Bou_58406	0	5	27	12	0	0.416667	-0.416667	0	0.00137558	11	0.00759571	TRUE	#N/A
Bou_1166	0	5	27	12	0	0.416667	-0.416667	0	0.00137558	23	0.00759571	TRUE	#N/A
Bou_1304	0	5	27	12	0	0.416667	-0.416667	0	0.00137558	9	0.00759571	TRUE	#N/A
Bou_29393	0	5	27	12	0	0.416667	-0.416667	0	0.00137558	36	0.00759571	TRUE	#N/A
Bou_74155	0	5	27	12	0	0.416667	-0.416667	0	0.00137558	10	0.00759571	TRUE	serine threonine-protein kinase
Bou_6499	0	5	27	12	0	0.416667	-0.416667	0	0.00137558	16	0.00759571	TRUE	Rab3 GTPase-activating protein catalytic subunit
Bou_98188	0	5	27	12	0	0.416667	-0.416667	0	0.00137558	9	0.00759571	TRUE	TSL-kinase interacting protein
Bou_33663	0	5	27	12	0	0.416667	-0.416667	0	0.00137558	41	0.00759571	TRUE	TFIIS helical bundle-like domain
Bou_116907	0	5	27	12	0	0.416667	-0.416667	0	0.00137558	25	0.00759571	TRUE	K10405 kinesin family member C1
Bou_31076	0	5	27	12	0	0.416667	-0.416667	0	0.00137558	12	0.00759571	TRUE	K05933 aminocyclopropanecarboxylate oxidase
Bou_125678	0	5	27	12	0	0.416667	-0.416667	0	0.00137558	10	0.00759571	TRUE	membrane protein At1g16860-like
Bou_71581	0	5	27	12	0	0.416667	-0.416667	0	0.00137558	23	0.00759571	TRUE	Belongs to the chaperonin (HSP60) family
Bou_96268	0	5	27	12	0	0.416667	-0.416667	0	0.00137558	50	0.00759571	TRUE	beta-D-xylosidase 7
Bou_71710	0	5	27	12	0	0.416667	-0.416667	0	0.00137558	24	0.00759571	TRUE	Transcription factor that specifically binds AT-rich DNA sequences related to the nuclear matrix attachment regions (MARs)
Bou_28747	0	5	27	12	0	0.416667	-0.416667	0	0.00137558	27	0.00759571	TRUE	Vacuolar protein sorting 55
Bou_33768	0	5	27	12	0	0.416667	-0.416667	0	0.00137558	6	0.00759571	TRUE	K07759 poly(ADP-ribose) glycohydrolase
Bou_104831	0	5	27	12	0	0.416667	-0.416667	0	0.00137558	25	0.00759571	TRUE	Serine threonine-protein kinase
Bou_40150	0	5	27	12	0	0.416667	-0.416667	0	0.00137558	30	0.00759571	TRUE	K00981 phosphatidate cytidylyltransferase
Bou_135807	0	5	27	12	0	0.416667	-0.416667	0	0.00137558	10	0.00759571	TRUE	K01188 beta-glucosidase
Bou_135736	0	5	27	12	0	0.416667	-0.416667	0	0.00137558	43	0.00759571	TRUE	RNA recognition
Bou_43573	0	5	27	12	0	0.416667	-0.416667	0	0.00137558	20	0.00759571	TRUE	K03131 transcription initiation factor TFIID subunit 6
Bou_85758	0	5	27	12	0	0.416667	-0.416667	0	0.00137558	10	0.00759571	TRUE	Endoplasmic reticulum metallopeptidase
Bou_150046	0	5	27	12	0	0.416667	-0.416667	0	0.00137558	5	0.00759571	TRUE	K10527 enoyl-CoA hydratase/3-hydroxyacyl-CoA dehydrogenase
Bou_73086	0	5	27	12	0	0.416667	-0.416667	0	0.00137558	6	0.00759571	TRUE	K20924 cellulose synthase-like protein
Bou_138861	0	5	27	12	0	0.416667	-0.416667	0	0.00137558	16	0.00759571	TRUE	K13429 chitin elicitor receptor kinase 1
Bou_135931	0	5	27	12	0	0.416667	-0.416667	0	0.00137558	37	0.00759571	TRUE	K14491 two-component response regulator ARR-B family
Bou_134837	0	5	27	12	0	0.416667	-0.416667	0	0.00137558	19	0.00759571	TRUE	Inositol hexakisphosphate
Bou_74016	0	5	27	12	0	0.416667	-0.416667	0	0.00137558	12	0.00759571	TRUE	K15501 serine/threonine-protein phosphatase 6 regulatory subunit 3
Bou_90159	0	5	27	12	0	0.416667	-0.416667	0	0.00137558	8	0.00759571	TRUE	K14998 surfeit locus 1 family protein
Bou_42606	0	5	27	12	0	0.416667	-0.416667	0	0.00137558	9	0.00759571	TRUE	Protein downstream neighbor of
Bou_122113	0	5	27	12	0	0.416667	-0.416667	0	0.00137558	22	0.00759571	TRUE	K03022 DNA-directed RNA polymerase III subunit RPC8
Bou_103295	0	5	27	12	0	0.416667	-0.416667	0	0.00137558	6	0.00759571	TRUE	Belongs to the 'GDSL' lipolytic enzyme family
Bou_134227	0	5	27	12	0	0.416667	-0.416667	0	0.00137558	13	0.00759571	TRUE	K04733 interleukin-1 receptor-associated kinase 4
Bou_27277	0	5	27	12	0	0.416667	-0.416667	0	0.00137558	16	0.00759571	TRUE	K00025 malate dehydrogenase
Bou_15450	0	5	27	12	0	0.416667	-0.416667	0	0.00137558	10	0.00759571	TRUE	K03671 thioredoxin 1
Bou_82365	0	5	27	12	0	0.416667	-0.416667	0	0.00137558	17	0.00759571	TRUE	-
Bou_24296	0	5	27	12	0	0.416667	-0.416667	0	0.00137558	6	0.00759571	TRUE	K15289 solute carrier family 35, member F5
Bou_95659.2	0	5	27	12	0	0.416667	-0.416667	0	0.00137558	6	0.00759571	TRUE	K05674 ATP-binding cassette, subfamily C (CFTR/MRP), member 10
Bou_98456	0	5	27	12	0	0.416667	-0.416667	0	0.00137558	7	0.00759571	TRUE	K07300 Ca2+:H+ antiporter
Bou_72462	0	5	27	12	0	0.416667	-0.416667	0	0.00137558	29	0.00759571	TRUE	K14802 phospholipid-transporting ATPase
Bou_136748.2	0	5	27	12	0	0.416667	-0.416667	0	0.00137558	15	0.00759571	TRUE	K11269 chromosome transmission fidelity protein 18
Bou_86888	0	5	27	12	0	0.416667	-0.416667	0	0.00137558	40	0.00759571	TRUE	ARM-repeat Tetratricopeptide repeat (TPR)-like protein
Bou_112348	0	5	27	12	0	0.416667	-0.416667	0	0.00137558	8	0.00759571	TRUE	Protein of unknown function (DUF616)
Bou_66705	0	5	27	12	0	0.416667	-0.416667	0	0.00137558	26	0.00759571	TRUE	superfamily. Protein
Bou_103183	0	5	27	12	0	0.416667	-0.416667	0	0.00137558	5	0.00759571	TRUE	#N/A
Bou_115573	0	5	27	12	0	0.416667	-0.416667	0	0.00137558	25	0.00759571	TRUE	K18211 synaptosomal-associated protein 25
Bou_144508	0	5	27	12	0	0.416667	-0.416667	0	0.00137558	8	0.00759571	TRUE	K20720 reticulon-4
Bou_78238	0	5	27	12	0	0.416667	-0.416667	0	0.00137558	10	0.00759571	TRUE	#N/A
Bou_75210	0	5	27	12	0	0.416667	-0.416667	0	0.00137558	10	0.00759571	TRUE	transcription factor
Bou_18863	0	5	27	12	0	0.416667	-0.416667	0	0.00137558	6	0.00759571	TRUE	#N/A
Bou_17765	0	5	27	12	0	0.416667	-0.416667	0	0.00137558	16	0.00759571	TRUE	K18270 Rab3 GTPase-activating protein catalytic subunit
Bou_11260	0	5	27	12	0	0.416667	-0.416667	0	0.00137558	18	0.00759571	TRUE	#N/A
Bou_6229	0	5	27	12	0	0.416667	-0.416667	0	0.00137558	45	0.00759571	TRUE	#N/A
Bou_43250	0	5	27	12	0	0.416667	-0.416667	0	0.00137558	7	0.00759571	TRUE	Belongs to the TUB family
Bou_143865	0	5	27	12	0	0.416667	-0.416667	0	0.00137558	19	0.00759571	TRUE	Pyridine nucleotide-disulfide oxidoreductase domain-containing protein
Bou_117713	0	5	27	12	0	0.416667	-0.416667	0	0.00137558	29	0.00759571	TRUE	#N/A
Bou_49996	0	5	27	12	0	0.416667	-0.416667	0	0.00137558	5	0.00759571	TRUE	#N/A
Bou_141487	0	5	27	12	0	0.416667	-0.416667	0	0.00137558	10	0.00759571	TRUE	K10666 E3 ubiquitin-protein ligase RNF5
Bou_59083	0	5	27	12	0	0.416667	-0.416667	0	0.00137558	17	0.00759571	TRUE	Protein AUXIN RESPONSE
Bou_143949	27	7	27	12	1	0.583333	0.416667	inf	0.00137558	37	0.00759571	TRUE	K12813 pre-mRNA-splicing factor ATP-dependent RNA helicase DHX16
Bou_40556	27	7	27	12	1	0.583333	0.416667	inf	0.00137558	67	0.00759571	TRUE	#N/A
Bou_95666	27	7	27	12	1	0.583333	0.416667	inf	0.00137558	199	0.00759571	TRUE	K15332 tRNA (uracil-5-)-methyltransferase
Bou_142876	27	7	27	12	1	0.583333	0.416667	inf	0.00137558	100	0.00759571	TRUE	K09838 zeaxanthin epoxidase
Bou_99036	27	7	27	12	1	0.583333	0.416667	inf	0.00137558	35	0.00759571	TRUE	#N/A
Bou_44429	27	7	27	12	1	0.583333	0.416667	inf	0.00137558	38	0.00759571	TRUE	K06672 cohesin loading factor subunit SCC2
Bou_10234	26	6	27	12	0.962963	0.5	0.462963	26	0.0016735	104	0.00878882	TRUE	#N/A
Bou_53270	26	6	27	12	0.962963	0.5	0.462963	26	0.0016735	97	0.00878882	TRUE	Abscisic acid receptor
Bou_44072	26	6	27	12	0.962963	0.5	0.462963	26	0.0016735	267	0.00878882	TRUE	K13457 disease resistance protein RPM1
Bou_78121	26	6	27	12	0.962963	0.5	0.462963	26	0.0016735	193	0.00878882	TRUE	K12195 charged multivesicular body protein 6
Bou_36915	26	6	27	12	0.962963	0.5	0.462963	26	0.0016735	96	0.00878882	TRUE	K01535 H+-transporting ATPase
Bou_104657	26	6	27	12	0.962963	0.5	0.462963	26	0.0016735	50	0.00878882	TRUE	K10807 ribonucleoside-diphosphate reductase subunit M1
Bou_143012	27	6	27	12	1	0.5	0.5	inf	0.000283208	76	0.0029705	TRUE	K04506 E3 ubiquitin-protein ligase SIAH1
Bou_14695	27	6	27	12	1	0.5	0.5	inf	0.000283208	33	0.0029705	TRUE	#N/A
Bou_8849	27	6	27	12	1	0.5	0.5	inf	0.000283208	65	0.0029705	TRUE	K00588 caffeoyl-CoA O-methyltransferase
Bou_30951	27	6	27	12	1	0.5	0.5	inf	0.000283208	118	0.0029705	TRUE	K03549 KUP system potassium uptake protein
Bou_9429	27	6	27	12	1	0.5	0.5	inf	0.000283208	73	0.0029705	TRUE	K00695 sucrose synthase
Bou_132509	27	6	27	12	1	0.5	0.5	inf	0.000283208	60	0.0029705	TRUE	Organic cation carnitine transporter
Bou_132539	25	5	27	12	0.925926	0.416667	0.509259	17.5	0.00137591	156	0.00759571	TRUE	K14773 U3 small nucleolar RNA-associated protein 23
Bou_2837	25	5	27	12	0.925926	0.416667	0.509259	17.5	0.00137591	246	0.00759571	TRUE	#N/A
Bou_126897	25	5	27	12	0.925926	0.416667	0.509259	17.5	0.00137591	180	0.00759571	TRUE	K01853 cycloartenol synthase
Bou_64713	25	5	27	12	0.925926	0.416667	0.509259	17.5	0.00137591	88	0.00759571	TRUE	receptor-like protein kinase
Bou_8688	25	5	27	12	0.925926	0.416667	0.509259	17.5	0.00137591	72	0.00759571	TRUE	#N/A
Bou_53254	25	5	27	12	0.925926	0.416667	0.509259	17.5	0.00137591	34	0.00759571	TRUE	Uncharacterised protein family (UPF0183)
Bou_115476	25	5	27	12	0.925926	0.416667	0.509259	17.5	0.00137591	61	0.00759571	TRUE	rho GTPase-activating protein
Bou_139454	25	5	27	12	0.925926	0.416667	0.509259	17.5	0.00137591	35	0.00759571	TRUE	Hydroxyproline-rich glycoprotein family protein
Bou_12462	25	5	27	12	0.925926	0.416667	0.509259	17.5	0.00137591	30	0.00759571	TRUE	-
Bou_65304	26	5	27	12	0.962963	0.416667	0.546296	36.4	0.000355619	89	0.00349442	TRUE	#N/A
Bou_21139	17	1	27	12	0.62963	0.0833333	0.546296	18.7	0.00187422	18	0.00967957	TRUE	K18826 calmodulin-lysine N-methyltransferase
Bou_73121.1	24	4	27	12	0.888889	0.333333	0.555556	16	0.000911001	190	0.0073312	TRUE	#N/A
Bou_40692	24	4	27	12	0.888889	0.333333	0.555556	16	0.000911001	29	0.0073312	TRUE	IQ-domain
Bou_77425	24	4	27	12	0.888889	0.333333	0.555556	16	0.000911001	28	0.0073312	TRUE	isoform X1
Bou_108285	22	3	27	12	0.814815	0.25	0.564815	13.2	0.00125654	163	0.00759571	TRUE	K01955 carbamoyl-phosphate synthase large subunit
Bou_73639	20	2	27	12	0.740741	0.166667	0.574074	14.2857	0.00138529	80	0.00759571	TRUE	K01597 diphosphomevalonate decarboxylase
Bou_147239	27	5	27	12	1	0.416667	0.583333	inf	5.14923e-05	61	0.00113101	TRUE	K11855 ubiquitin carboxyl-terminal hydrolase 36/42
Bou_83472	27	5	27	12	1	0.416667	0.583333	inf	5.14923e-05	63	0.00113101	TRUE	Belongs to the tRNA nucleotidyltransferase poly(A) polymerase family
Bou_48317	27	5	27	12	1	0.416667	0.583333	inf	5.14923e-05	82	0.00113101	TRUE	-
Bou_81726	27	5	27	12	1	0.416667	0.583333	inf	5.14923e-05	32	0.00113101	TRUE	inactive shikimate kinase like 2 chloroplastic
Bou_58417	27	5	27	12	1	0.416667	0.583333	inf	5.14923e-05	129	0.00113101	TRUE	isoform X1
Bou_74067	25	4	27	12	0.925926	0.333333	0.592593	25	0.000282741	82	0.0029705	TRUE	K01265 methionyl aminopeptidase
Bou_139770	23	3	27	12	0.851852	0.25	0.601852	17.25	0.00049964	102	0.00420193	TRUE	calmodulin-binding family
Bou_62338	23	3	27	12	0.851852	0.25	0.601852	17.25	0.00049964	71	0.00420193	TRUE	K02435 aspartyl-tRNA(Asn)/glutamyl-tRNA(Gln) amidotransferase subunit C
Bou_47121	23	3	27	12	0.851852	0.25	0.601852	17.25	0.00049964	78	0.00420193	TRUE	Protein TIFY 4B-like isoform X1
Bou_130147	23	3	27	12	0.851852	0.25	0.601852	17.25	0.00049964	26	0.00420193	TRUE	Pentatricopeptide repeat-containing protein
Bou_118930	26	4	27	12	0.962963	0.333333	0.62963	52	6.41059e-05	30	0.00127325	TRUE	K03353 anaphase-promoting complex subunit 6
Bou_119143	24	3	27	12	0.888889	0.25	0.638889	24	0.000170551	58	0.00292128	TRUE	UDP-rhamnose rhamnosyltransferase 1
Bou_93970	22	2	27	12	0.814815	0.166667	0.648148	22	0.000220426	43	0.0029705	TRUE	SelT-like protein
Bou_144753	23	2	27	12	0.851852	0.166667	0.685185	28.75	7.91376e-05	50	0.00146258	TRUE	Zinc finger protein
Bou_24586	26	3	27	12	0.962963	0.25	0.712963	78	9.44718e-06	36	0.000400861	TRUE	60S ribosomal Protein
Bou_106388	27	3	27	12	1	0.25	0.75	inf	1.03815e-06	30	0.000138445	TRUE	DNA-binding protein
